# Supplementary material for: A novel π-conjugated poly(biphenyl diimide) with full utilization of carbonyls as a highly stable organic electrode for Li-ion batteries
Source: Royal Society of Chemistry journal article supplement (doi:10.1039/d0ra05483f), 2020-01-01
Supplement: d0ra05483f1.pdf [file d0ra05483f1.pdf]

## Supporting Information

*for*

### **A novel $\pi$ -conjugated poly(phenyl diimide) with full utilization of carbonyls as highly stable organic electrode for Li-ion batteries**

Zhijun Wang,<sup>a</sup> Bingjie Zhang,<sup>a</sup> Yueyan Zhang,<sup>a</sup> Ni yan<sup>b</sup> and Gang He<sup>\*a</sup>

<sup>a</sup>Frontier Institute of Science and Technology jointly with College of Science, State Key Laboratory for Strength and Vibration of Mechanical Structures, Xi'an Jiaotong University, Xi'an 710054, China

E-mail: ganghe@mail.xjtu.edu.cn

<sup>b</sup>Polymer Materials and Engineering Department and Institute of Polymer Materials, School of Materials Science and Engineering, Chang'an University, Xi'an, 710064, China

#### **Contents**

|                                                                                   |    |
|-----------------------------------------------------------------------------------|----|
| 1. Materials and instrumentation.....                                             | 2  |
| 2. Synthetic procedures .....                                                     | 4  |
| 3. TGA and DSC curves for <b>PBPI</b> .....                                       | 6  |
| 4. UV-vis absorption and fluorescence emission spectra for <b>PBPI</b> .....      | 6  |
| 5. Cyclic voltammograms in THF for <b>PBPI</b> .....                              | 7  |
| 5. Electrochemical results. ....                                                  | 8  |
| 7. <sup>1</sup> H NMR and <sup>13</sup> C NMR of <b>BPI</b> and <b>PBPI</b> ..... | 11 |
| 8. DFT computations .....                                                         | 13 |
| Reference .....                                                                   | 36 |

## Experimental Section

### 1. Materials and instrumentation

THF and toluene were distilled from sodium/ benzophenone prior to use. Ac<sub>2</sub>O was distilled from phosphorus pentoxide under reduced pressure. Other solvents were purchased and were used without further purification. Sodium periodate (99%), tris(dibenzylideneacetone)dipalladium (Pd<sub>2</sub>(dba)<sub>3</sub>) (98%) and triethylphosphine (P(o-tolyl)<sub>3</sub>, 97%) were purchased from Energy Chemical Inc. and used as received. Sodium acetate (98.5%) purchased from TCI Chemicals. If no other special indicated, other reagents and solvents were used as commercially available without further purification. Column chromatographic purification of products was accomplished using 200-300 mesh silica gel.

#### BET test:

| Analysis                                                 | Report                             |
|----------------------------------------------------------|------------------------------------|
| Operator: operator Date:7/23/2020                        | Operator: operator Date:2020/07/23 |
| Sample ID: 2                                             | Filename: QW2_200723_01_jun2.QPS   |
| Sample Desc:                                             | Comment:                           |
| Sample weight: 0.3600 g                                  |                                    |
| Analysis Time: 269.7 min End of run: 7/23/2020 4:08:11   |                                    |
| Instrument: QuadraSorb Station 2                         |                                    |
| Void Vol.: He Mode.Cell: 9mm large bulbRun mode Standard |                                    |
| Instrument version:5.13                                  |                                    |
| Thermal delay: 180 sec                                   | He evac time: 3 min                |
| Outgas Time: 5.0 hrs                                     | OutgasTemp: 200.0 C                |
| Analysis gas: Nitrogen                                   | Bath Temp: 77.3 K                  |

Press. Tolerance:0.050/0.050 (ads/des) Equil time: 30/30 sec (ads/des) Equil timeout:  
300/300 sec (ads/des)

#### Data Reduction Parameters

Adsorbate      Nitrogen                      Temperature      77.350K

#### BET summary

Slope =    64.276

Intercept =    5.716e+01

Correlation coefficient, r =    0.997828

C constant=    2.124

Surface Area =    28.677 m<sup>2</sup>/g

## 2. Synthetic procedures

### Synthesis of **BPI**

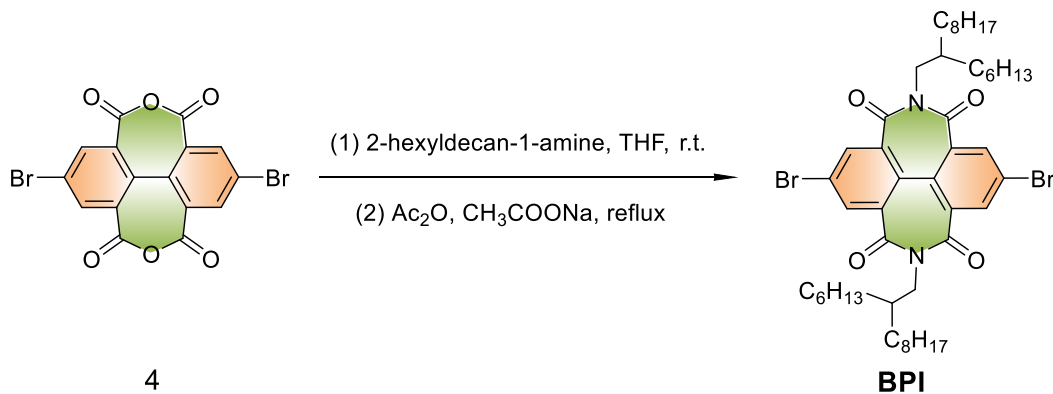

To a solution of compound **4**<sup>1</sup> (0.452 g, 1 mmol) in dry THF (20mL) was added 2-hexyldecan-1-amine (0.388 g, 1.5 mmol) at room temperature under nitrogen and stirred overnight. After the solvent was removed under reduced pressure, anhydrous sodium acetate (0.33 g, 10 mmol) and acetic anhydride (5 mL) were added, then the resulting mixture was heated to reflux for another 4 hours. After cooling to room temperature, the mixture continued to stir at this temperature for several hours. The reaction mixture was diluted with water and thoroughly extracted with dichloromethane. The combined organic phases were washed with water and dried over Na<sub>2</sub>SO<sub>4</sub>. After concentrated under reduced pressure, the residue was purified by column chromatography on silica gel with dichloromethane/ hexane (1:2) to give **BPI** as colorless oil (403 mg, 45% yield). <sup>1</sup>H NMR (400 MHz, CDCl<sub>3</sub>) δ (ppm): 7.97 (s, 4H), 4.11 (m, J = 11.2 Hz, 2H), 3.76 (m, J = 9.3 Hz, 2H), 1.90 (m, 4H), 1.24 (m, 48H), 0.87 (t, J = 3.8 Hz, 12H). <sup>13</sup>C NMR (100 MHz, CDCl<sub>3</sub>) δ 169.32, 153.25, 149.37, 142.46, 138.23, 130.34, 124.05, 118.62, 116.07, 49.75, 36.96, 31.43, 29.68, 29.47, 29.28. FT-IR (KBr, cm<sup>-1</sup>) ν 3253, 3026, 2928, 2906, 2863, 1712, 1661, 1567, 1479, 1386, 1329, 1172, 943, 916, 854, 772, 746, 724. Anal. Calcd for C<sub>48</sub>H<sub>70</sub>Br<sub>2</sub>O<sub>4</sub>N<sub>2</sub>: C, 64.14; H, 7.85; N, 3.12 Found: C, 64.22; H, 7.80 N, 3.08. HRMS (MALDI-FT) (m/z): (M<sup>+</sup>H)<sup>+</sup> Calcd for C<sub>48</sub>H<sub>71</sub>Br<sub>2</sub>O<sub>4</sub>N<sub>2</sub> 898.3682; Found, 899.3745.

## Synthesis of **PBPI**

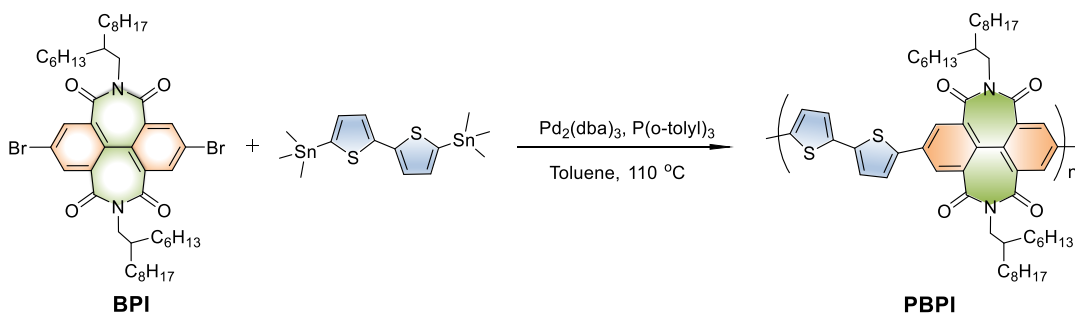

2,5-Bis(trimethylstannyl)thiophene<sup>2</sup> (123mg, 0.250 mmol) and **BPI** (0.225 g, 0.250 mmol) were placed in a 50 mL two-necked flask purged by argon gas. After dissolving in deoxidized toluene (10 mL), argon bubbling was conducted for 30 min.  $\text{Pd}_2(\text{dba})_3$  (13.7 mg, 0.0150 mmol) and  $\text{P}(\text{o-Tolyl})_3$  (38.0 mg, 0.125 mmol) were then added to start the polymerization and the solution was stirred at  $110\text{ }^\circ\text{C}$  for 72 h. The reaction was then quenched with a 5M HCl solution (2 mL). The solution was extracted with chloroform and washed with water and  $\text{KF}(\text{aq})$ , and then precipitated in 200 mL of methanol. The precipitate was purified by Soxhlet extraction using acetone to remove the residual monomer and then extracted with chloroform. After evaporating the chloroform, the resulting solid was collected and dried overnight under vacuum to afford **PBPI** as an orange solid (150 mg, 64%),  $^1\text{H NMR}$  (400 MHz,  $\text{CDCl}_3$ )  $\delta$  (ppm): 8.05 (s, 4H), 7.43 (s, 2H), 7.26 (s, 2H), 4.19 (s, 2H), 3.85 (s, 2H), 2.01 (s, 2H), 1.24 (d, 48H), 0.85 (s, 12H).  $M_n = 2.03 \times 10^4$ ,  $M_w = 5.09 \times 10^4$ ,  $\text{PDI} = 2.50$  by GPC. FT-IR (KBr,  $\text{cm}^{-1}$ )  $\nu$  2968, 2901, 2360, 1705, 1653, 1594, 1449, 1394, 1316, 1264, 1123, 1066, 902, 788, 771, 712.

### 3. TGA and DSC curves for PBPI.

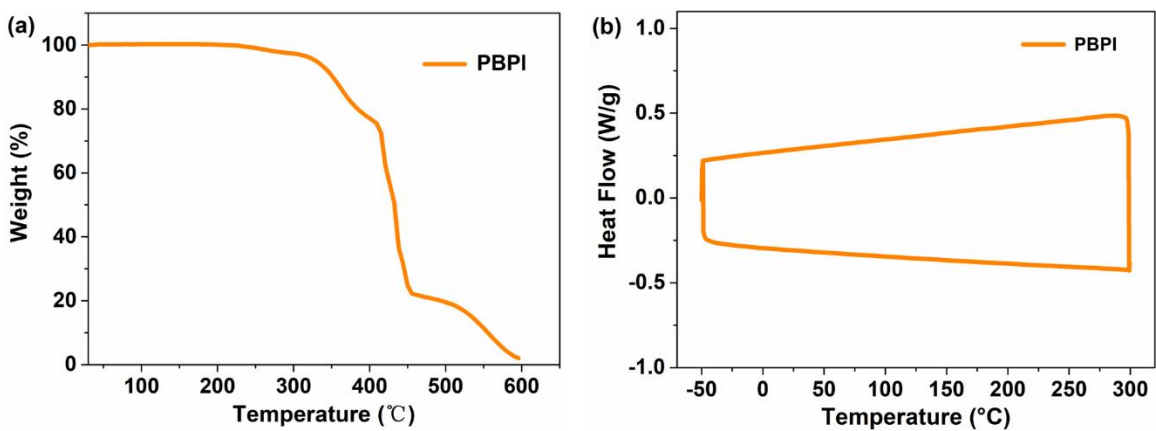

Fig. S1. (a) TGA measurements and (b) DSC measurements for **PBPI**.

### 4. UV-vis absorption and fluorescence emission spectra for PBPI.

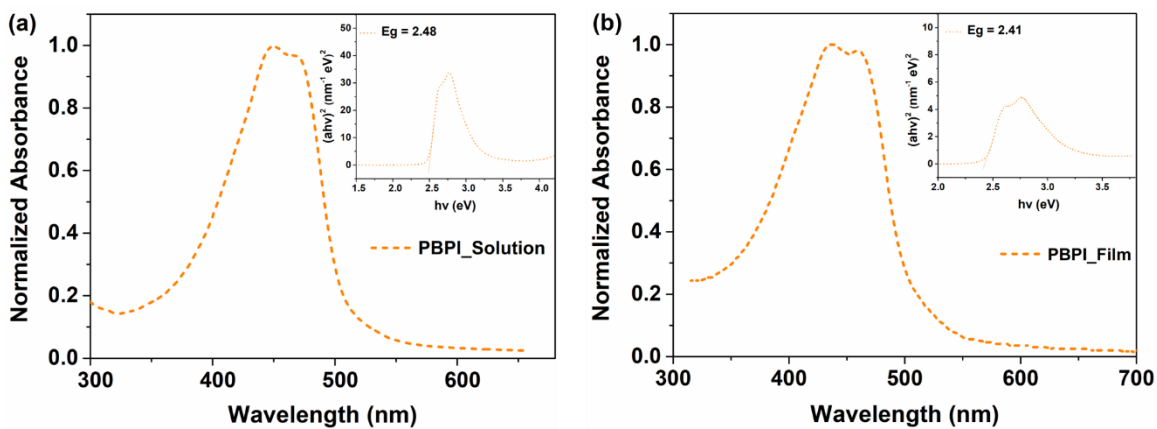

Fig. S2. UV-vis absorption of **PBPI** dissolved in DCM ( $5 \times 10^{-5}$  M) and in film state.

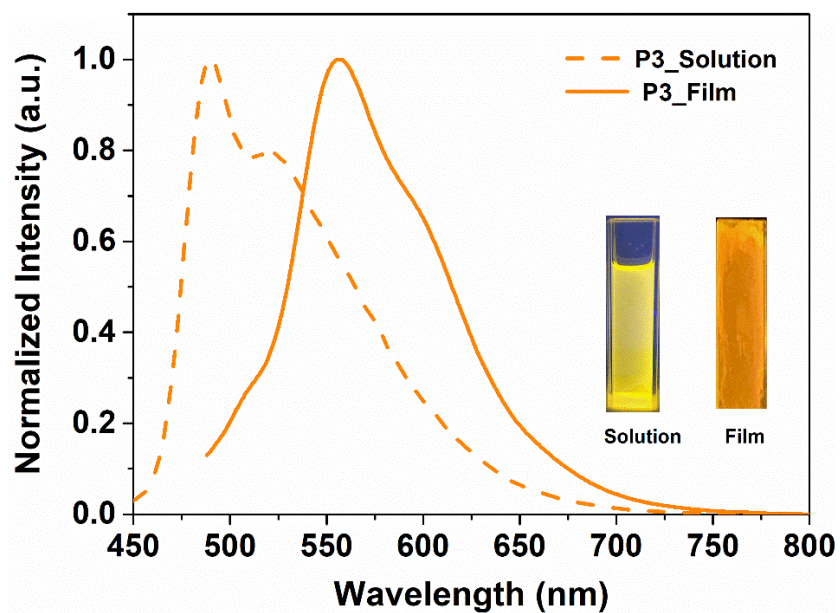

**Fig. S3.** Fluorescence Emission spectrum of **PBPI** dissolved in DCM ( $5 \times 10^{-5}$  M) and in film state.

### 5. Cyclic voltammograms in THF for PBPI

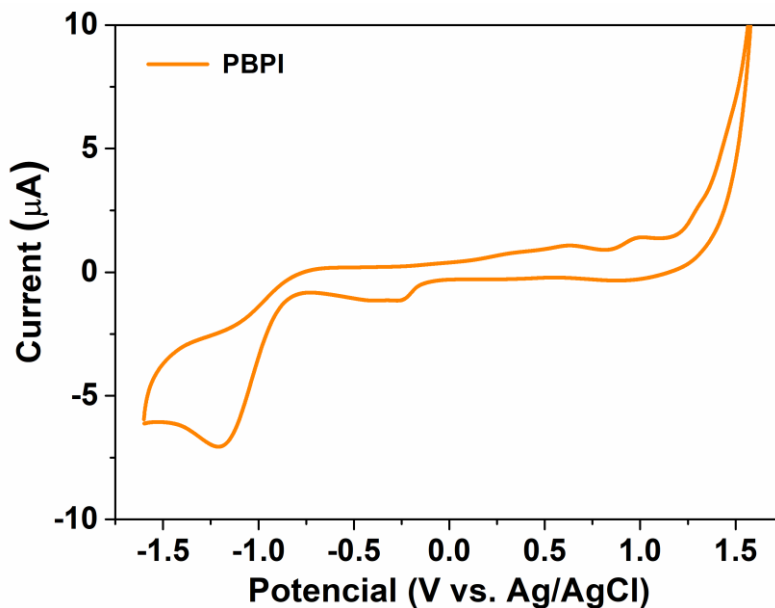

**Fig. S4.** Cyclic voltammograms of **PBPI** dissolved in THF (0.1 M  $\text{Bu}_4^+\text{NPF}_6^-$  as supporting electrolyte; Ag/AgCl as a reference electrode; scan rate of  $50 \text{ mV s}^{-1}$ ).

**Table S1.** Optical electrochemical and DFT calculation data of **PBPI**.

| polymers    | Mn <sup>a</sup><br>(kD) | $\lambda_{\text{abs}}$ (nm) |                   | $\lambda_{\text{em}}$ (nm) |                   | LUMO <sup>d</sup><br>(eV) | HOMO <sup>e</sup><br>(eV) | E <sub>g</sub> <sup>f</sup><br>(eV) | LUMO <sup>g</sup><br>(eV) | HOMO <sup>g</sup><br>(eV) |
|-------------|-------------------------|-----------------------------|-------------------|----------------------------|-------------------|---------------------------|---------------------------|-------------------------------------|---------------------------|---------------------------|
|             |                         | Sol <sup>b</sup>            | Film <sup>c</sup> | Sol <sup>b</sup>           | Film <sup>c</sup> |                           |                           |                                     |                           |                           |
| <b>PBPI</b> | 20.3                    | 450, 469                    | 440, 463          | 489                        | 558               | -2.81                     | -5.29                     | 2.48                                | -2.17                     | -5.56                     |

<sup>a</sup>GPC versus polystyrene standards in TCB stabilised with 0.0125% BHT as eluent. <sup>b</sup>Solution absorption spectra in dichloroform. <sup>c</sup>Thin film absorption spectra from spin-cast from dichloroform solution. <sup>d</sup>Cyclic voltammetry determined with Fc/Fc<sup>+</sup> as an internal reference ( $\text{LUMO} = -4.7 - (E_{1/2}^{\text{red}} - E_{1/2}^{\text{red}} \text{Fc/Fc}^+)$ ). <sup>e</sup>Estimated from  $\text{HOMO} = \text{LUMO} - E_{\text{opt}}$ . <sup>f</sup>Optical energy gap estimated from the absorption onset of Solutions. <sup>g</sup>Estimated from DFT calculation.

## 5. Electrochemical results.

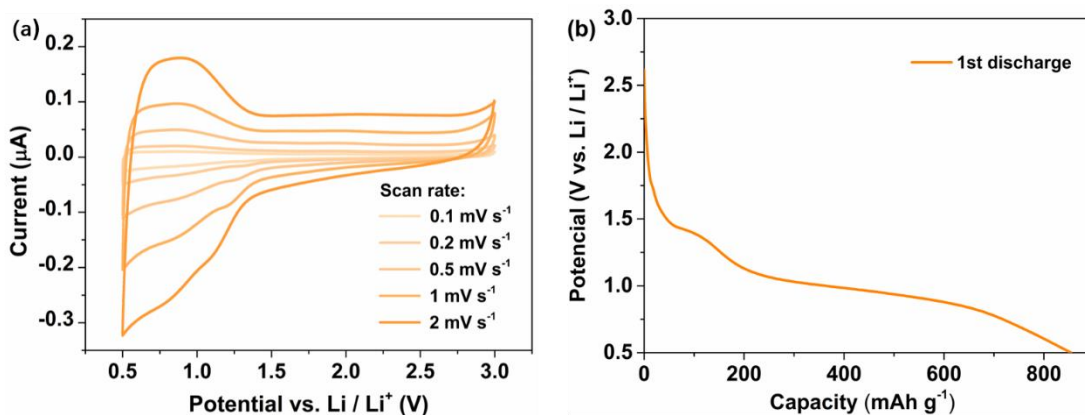

**Fig. S5.** (a) Cyclic voltammetry at different scan rates of the **PBPI** electrode. (b) The first cycle galvanostatic discharge curve of the **PBPI** electrode.

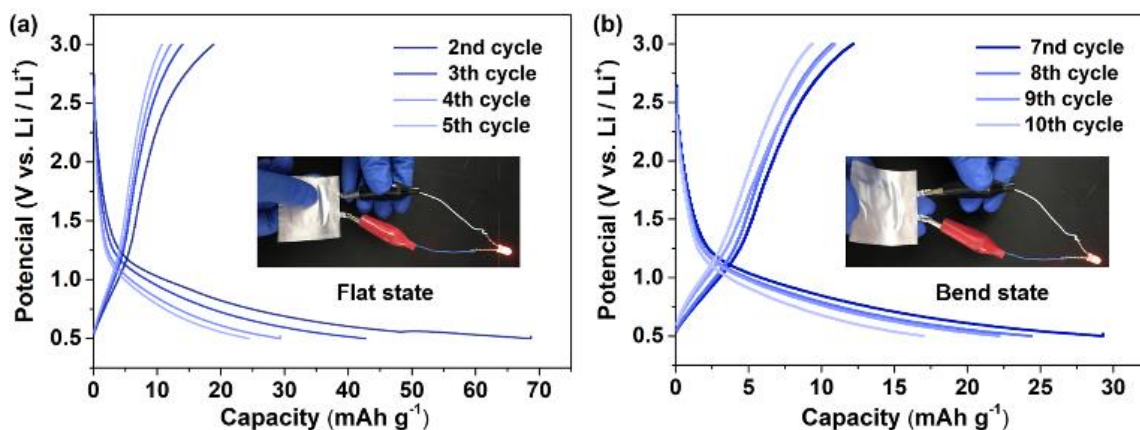

**Fig. S6.** Charge/discharge curves and digital photos of the flexible LIB lightening a LED under various states (insertion) of the battery in the flat and bend state .



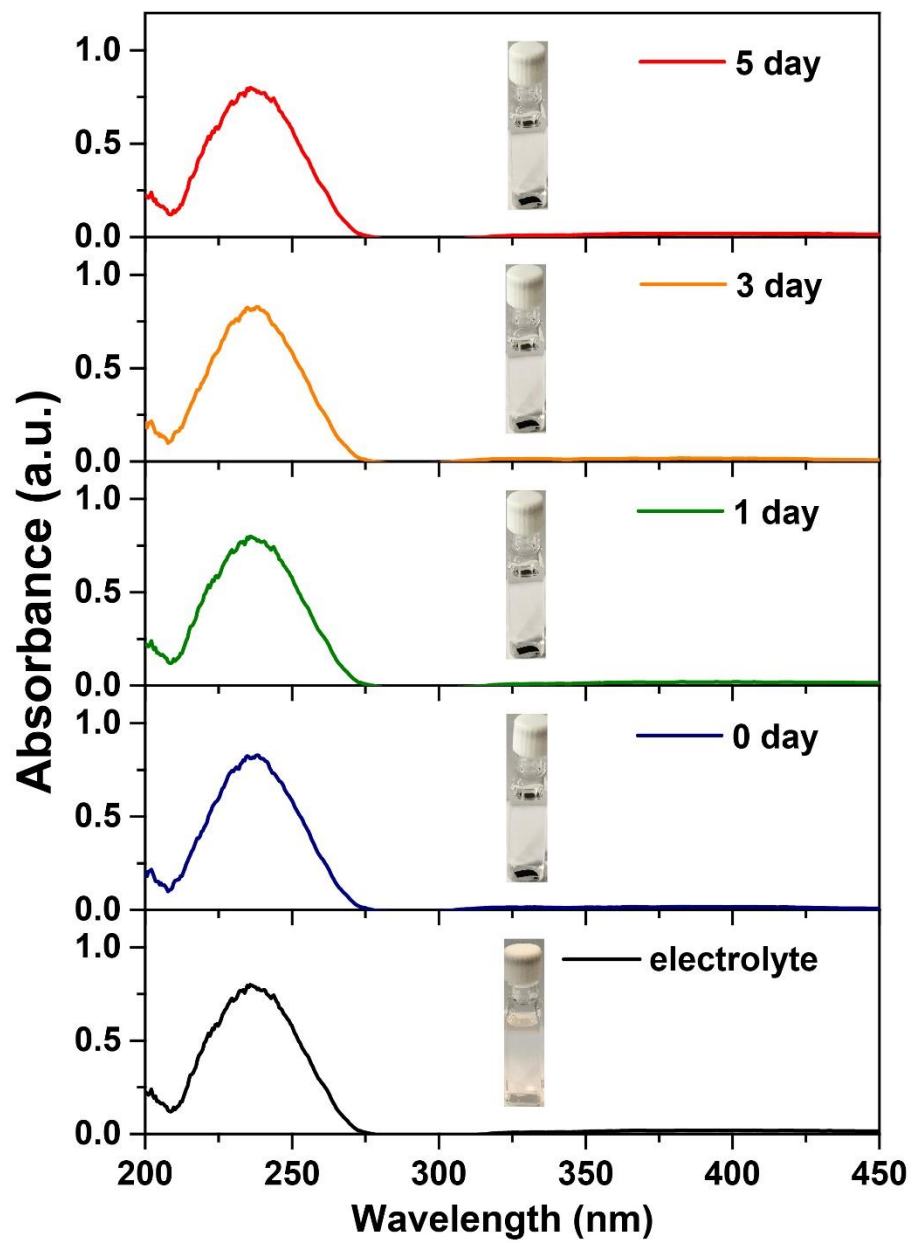

**Fig. S7.** Solubility test of **PBPI** electrode in electrolyte.

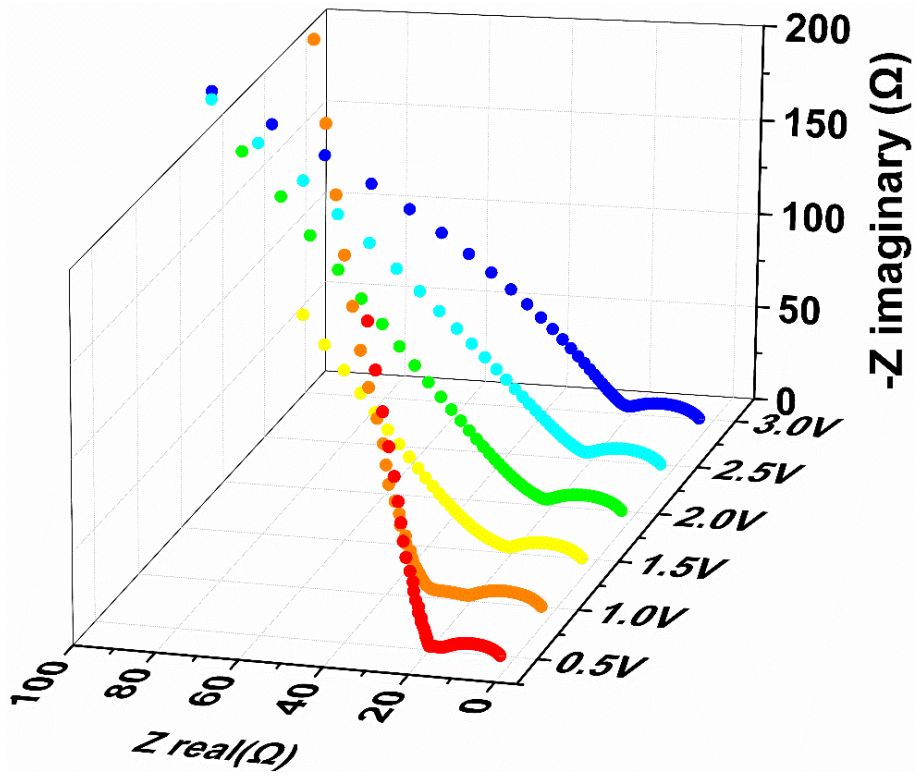

**Fig. S8.** Electrochemical impedance spectroscopy at various potential of **PBPI** electrode.

## 7. $^1\text{H}$ NMR and $^{13}\text{C}$ NMR of BPI and PBPI.

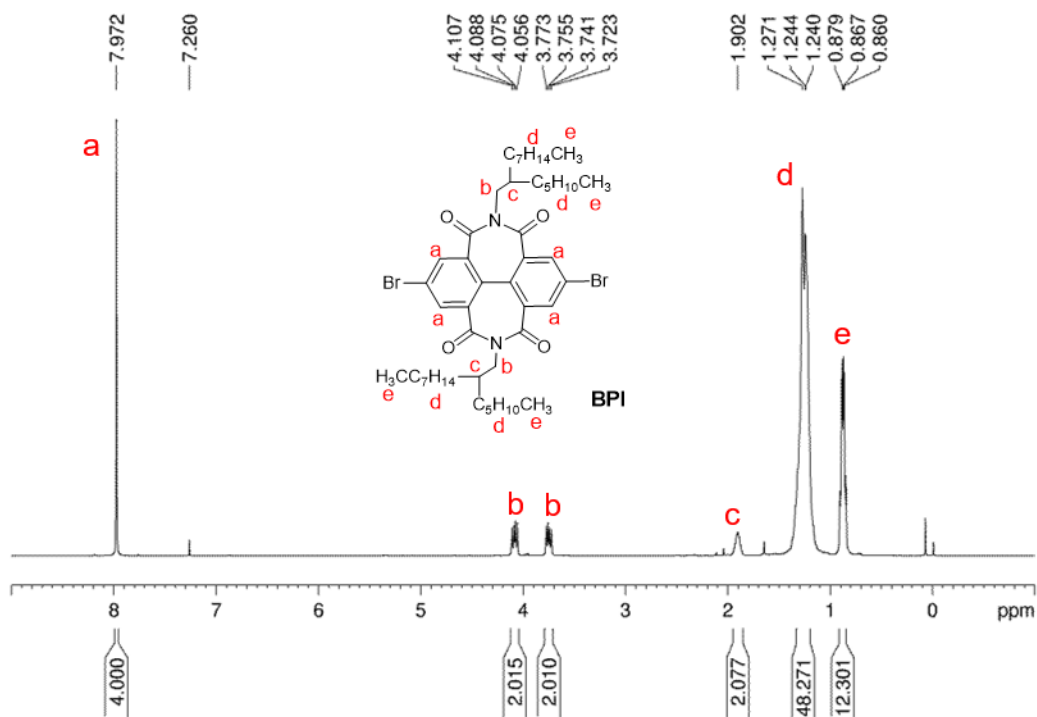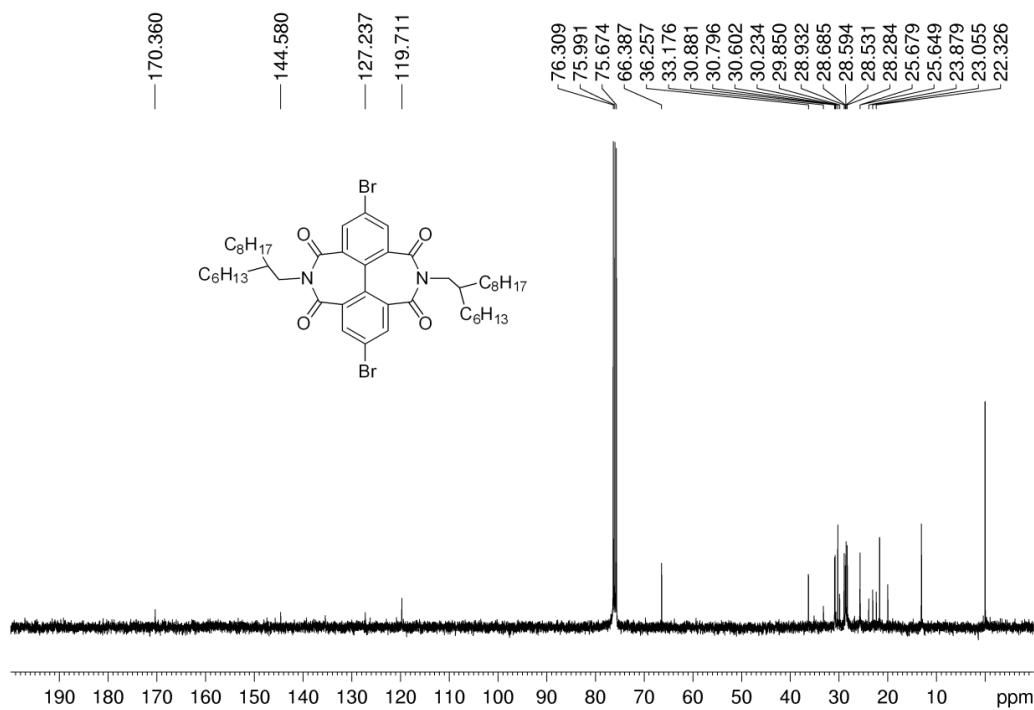

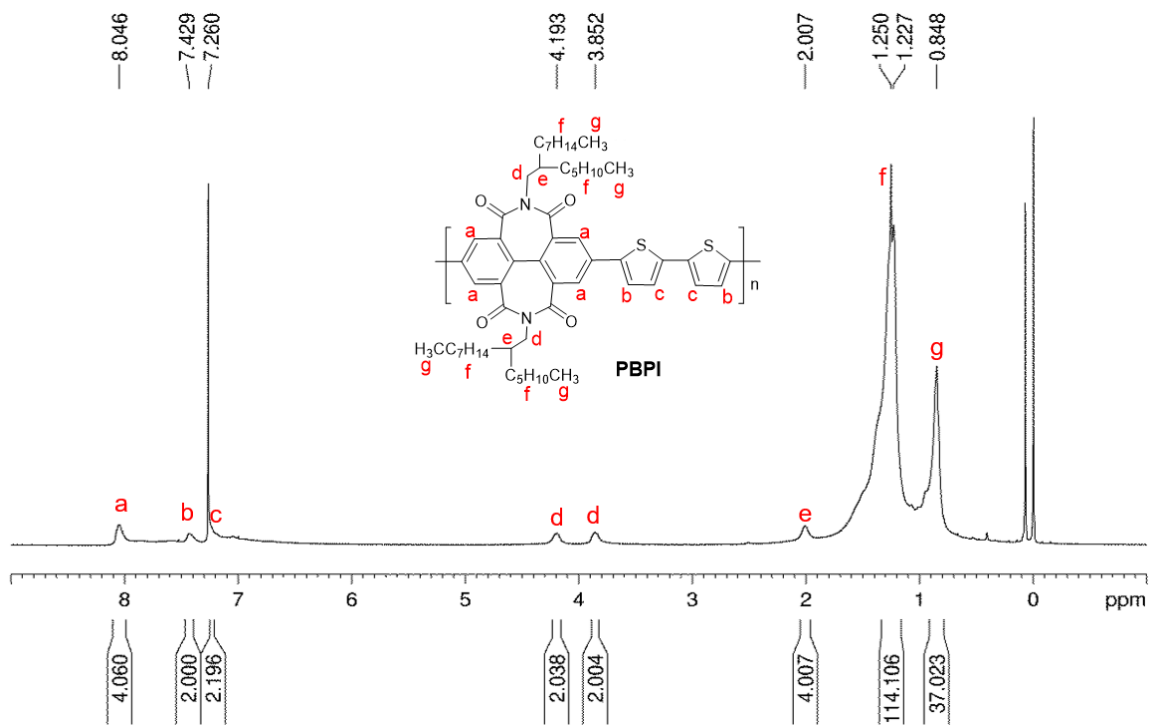

**Fig. S11.** <sup>1</sup>H NMR spectrum of **PBPI** (400M Hz, CDCl<sub>3</sub>)

## 8. DFT computations

The HOMO and LUMO energy levels of the compounds studied in this work were calculated using density functional theory (DFT) at the B3LYP/6-31G(d) level of theory with the Gaussian09 package. All of the geometries were optimized followed by harmonic frequencies at the same level of theory to verify that these stationary points were local minima. And the molecular orbitals, **PBPI-unit** and **PBPI-unit-1** orbitals were extracted from the output using Gauss View 5 and assuming an isovalue of 0.05. Meanwhile, the structures of **PBPI-unit** and **PBPI-unit-1** were studied and fully optimized in the dichloromethane without symmetry constraints.

**Table S2.** Comparison of HOMO/LUMO energy levels of **PBPI-unit** in CH<sub>2</sub>Cl<sub>2</sub> solution. (DFT, B3LYP/6-31g\*)

| compound           | HOMO     |       | LUMO     |       | gap  |
|--------------------|----------|-------|----------|-------|------|
|                    | hartree  | eV    | hartree  | eV    | eV   |
| <b>PBPI-unit</b>   | -0.20428 | -5.56 | -0.07981 | -2.17 | 3.39 |
| <b>PBPI-unit-1</b> | -0.20505 | -5.58 | -0.07937 | -2.16 | 4.42 |

**Table S1X.** Cartesian coordinates of optimized geometry of **PBPI-unit** in CH<sub>2</sub>Cl<sub>2</sub> solution (DFT, B3LYP/6-31g\*)

Standard orientation: (Ground State)

| Center Number | Atomic Number | Atomic Type | Coordinates (Angstroms) |           |           |
|---------------|---------------|-------------|-------------------------|-----------|-----------|
|               |               |             | X                       | Y         | Z         |
| 1             | 6             | 0           | 1.331144                | -0.407895 | -2.267516 |
| 2             | 6             | 0           | 0.872075                | -1.691756 | -2.640153 |
| 3             | 6             | 0           | 1.713451                | -2.582202 | -3.322654 |
| 4             | 6             | 0           | 2.986879                | -2.198194 | -3.720819 |
| 5             | 6             | 0           | 3.442868                | -0.929016 | -3.389291 |
| 6             | 6             | 0           | 2.650063                | -0.052558 | -2.635169 |

|    |   |   |           |           |           |
|----|---|---|-----------|-----------|-----------|
| 7  | 6 | 0 | 0.462140  | 0.537246  | -1.539563 |
| 8  | 6 | 0 | -0.910550 | 0.664858  | -1.851896 |
| 9  | 6 | 0 | -1.710438 | 1.612592  | -1.207730 |
| 10 | 6 | 0 | -1.223336 | 2.407093  | -0.162749 |
| 11 | 6 | 0 | 0.123170  | 2.238660  | 0.186025  |
| 12 | 6 | 0 | 0.963724  | 1.367459  | -0.510507 |
| 13 | 1 | 0 | 1.340707  | -3.574185 | -3.550037 |
| 14 | 1 | 0 | 4.430535  | -0.601575 | -3.692454 |
| 15 | 1 | 0 | -2.736861 | 1.716015  | -1.541201 |
| 16 | 1 | 0 | 0.543774  | 2.791930  | 1.016621  |
| 17 | 6 | 0 | 2.382964  | 1.426125  | -0.010991 |
| 18 | 6 | 0 | 3.374306  | 1.216920  | -2.284949 |
| 19 | 8 | 0 | 2.605217  | 1.524506  | 1.187675  |
| 20 | 8 | 0 | 4.107794  | 1.755837  | -3.100987 |
| 21 | 6 | 0 | -1.687438 | -0.148553 | -2.851714 |
| 22 | 6 | 0 | -0.488537 | -2.275578 | -2.377303 |
| 23 | 8 | 0 | -0.595567 | -3.445284 | -2.037190 |
| 24 | 8 | 0 | -2.533329 | 0.381576  | -3.557309 |
| 25 | 7 | 0 | 3.409107  | 1.613528  | -0.940295 |
| 26 | 7 | 0 | -1.615780 | -1.544229 | -2.765826 |
| 27 | 6 | 0 | -4.019164 | -2.210691 | -2.230166 |
| 28 | 1 | 0 | -4.298187 | -1.150136 | -2.154788 |
| 29 | 6 | 0 | 5.886588  | 1.471917  | -0.352449 |
| 30 | 1 | 0 | 6.105901  | 1.051607  | -1.344339 |
| 31 | 6 | 0 | -3.646742 | -2.716132 | -0.822204 |
| 32 | 1 | 0 | -3.354888 | -3.773740 | -0.891179 |
| 33 | 1 | 0 | -2.752659 | -2.178281 | -0.479876 |
| 34 | 6 | 0 | -4.737809 | -2.558854 | 0.245797  |
| 35 | 1 | 0 | -5.621962 | -3.150812 | -0.026784 |
| 36 | 1 | 0 | -5.067857 | -1.509863 | 0.280428  |
| 37 | 6 | 0 | 5.653500  | 0.305459  | 0.627662  |
| 38 | 1 | 0 | 4.763612  | -0.251324 | 0.305131  |
| 39 | 1 | 0 | 5.407974  | 0.717432  | 1.616557  |
| 40 | 6 | 0 | -5.211367 | -2.977126 | -2.865572 |
| 41 | 1 | 0 | -5.018516 | -3.135810 | -3.936530 |
| 42 | 1 | 0 | -5.272050 | -3.982168 | -2.424582 |
| 43 | 6 | 0 | -6.570443 | -2.272322 | -2.734374 |
| 44 | 1 | 0 | -6.791685 | -2.075949 | -1.677133 |
| 45 | 1 | 0 | -6.509140 | -1.287417 | -3.220145 |

|    |   |   |            |           |           |
|----|---|---|------------|-----------|-----------|
| 46 | 6 | 0 | 7.069201   | 2.393922  | 0.050574  |
| 47 | 1 | 0 | 6.807436   | 3.441084  | -0.159924 |
| 48 | 1 | 0 | 7.216702   | 2.339318  | 1.138529  |
| 49 | 6 | 0 | 8.393489   | 2.090368  | -0.667126 |
| 50 | 1 | 0 | 8.685221   | 1.046360  | -0.493492 |
| 51 | 1 | 0 | 8.240092   | 2.187230  | -1.751990 |
| 52 | 6 | 0 | 6.813683   | -0.690552 | 0.765720  |
| 53 | 1 | 0 | 7.696182   | -0.188846 | 1.185025  |
| 54 | 1 | 0 | 7.108808   | -1.052721 | -0.230429 |
| 55 | 6 | 0 | -4.265371  | -2.986531 | 1.642292  |
| 56 | 1 | 0 | -3.377651  | -2.399226 | 1.920325  |
| 57 | 1 | 0 | -3.936570  | -4.035897 | 1.607736  |
| 58 | 6 | 0 | -5.336998  | -2.827124 | 2.728502  |
| 59 | 1 | 0 | -6.226170  | -3.412956 | 2.451326  |
| 60 | 1 | 0 | -5.663458  | -1.776990 | 2.763728  |
| 61 | 6 | 0 | -4.862260  | -3.256204 | 4.122929  |
| 62 | 1 | 0 | -3.968119  | -2.675890 | 4.395576  |
| 63 | 1 | 0 | -4.542775  | -4.308573 | 4.089316  |
| 64 | 6 | 0 | -5.926792  | -3.085642 | 5.214264  |
| 65 | 1 | 0 | -6.821964  | -3.665691 | 4.943701  |
| 66 | 1 | 0 | -6.245830  | -2.033056 | 5.248928  |
| 67 | 6 | 0 | -5.450204  | -3.513859 | 6.608232  |
| 68 | 1 | 0 | -4.554847  | -2.935397 | 6.877285  |
| 69 | 1 | 0 | -5.133747  | -4.566248 | 6.574944  |
| 70 | 6 | 0 | -6.517232  | -3.336502 | 7.693496  |
| 71 | 1 | 0 | -6.145923  | -3.650553 | 8.675953  |
| 72 | 1 | 0 | -6.828804  | -2.287603 | 7.774397  |
| 73 | 1 | 0 | -7.412087  | -3.930618 | 7.469596  |
| 74 | 6 | 0 | -7.724948  | -3.071500 | -3.352455 |
| 75 | 1 | 0 | -7.505630  | -3.266374 | -4.412973 |
| 76 | 1 | 0 | -7.783210  | -4.057698 | -2.867971 |
| 77 | 6 | 0 | -9.084919  | -2.371089 | -3.237051 |
| 78 | 1 | 0 | -9.303789  | -2.175237 | -2.176578 |
| 79 | 1 | 0 | -9.029142  | -1.385420 | -3.722974 |
| 80 | 6 | 0 | -10.241009 | -3.171356 | -3.850822 |
| 81 | 1 | 0 | -10.295151 | -4.156980 | -3.366755 |
| 82 | 1 | 0 | -10.024353 | -3.364655 | -4.911186 |
| 83 | 6 | 0 | -11.596240 | -2.467211 | -3.727215 |
| 84 | 1 | 0 | -12.400304 | -3.064119 | -4.173130 |

|     |    |   |            |           |           |
|-----|----|---|------------|-----------|-----------|
| 85  | 1  | 0 | -11.855698 | -2.290253 | -2.675940 |
| 86  | 1  | 0 | -11.583926 | -1.493587 | -4.232884 |
| 87  | 6  | 0 | 6.453768   | -1.891003 | 1.652101  |
| 88  | 1  | 0 | 5.573159   | -2.398380 | 1.230974  |
| 89  | 1  | 0 | 6.149094   | -1.529212 | 2.645378  |
| 90  | 6  | 0 | 7.593479   | -2.905864 | 1.810268  |
| 91  | 1  | 0 | 8.470873   | -2.404118 | 2.244839  |
| 92  | 1  | 0 | 7.906085   | -3.258949 | 0.816126  |
| 93  | 6  | 0 | 7.216880   | -4.112873 | 2.679355  |
| 94  | 1  | 0 | 6.337161   | -4.610362 | 2.244479  |
| 95  | 1  | 0 | 6.905412   | -3.760100 | 3.673886  |
| 96  | 6  | 0 | 8.348841   | -5.136260 | 2.837034  |
| 97  | 1  | 0 | 9.227760   | -4.642595 | 3.278165  |
| 98  | 1  | 0 | 8.664091   | -5.486267 | 1.842510  |
| 99  | 6  | 0 | 7.964461   | -6.346464 | 3.698072  |
| 100 | 1  | 0 | 7.085704   | -6.838421 | 3.257155  |
| 101 | 1  | 0 | 7.650825   | -5.997640 | 4.692380  |
| 102 | 6  | 0 | 9.097789   | -7.366562 | 3.849244  |
| 103 | 1  | 0 | 8.791292   | -8.217210 | 4.469048  |
| 104 | 1  | 0 | 9.409040   | -7.760049 | 2.873478  |
| 105 | 1  | 0 | 9.979303   | -6.912360 | 4.318709  |
| 106 | 6  | 0 | 9.538416   | 3.014539  | -0.232873 |
| 107 | 1  | 0 | 9.245171   | 4.061183  | -0.404040 |
| 108 | 1  | 0 | 9.692873   | 2.915653  | 0.852048  |
| 109 | 6  | 0 | 10.860478  | 2.734609  | -0.959014 |
| 110 | 1  | 0 | 11.154967  | 1.688340  | -0.787523 |
| 111 | 1  | 0 | 10.707281  | 2.833342  | -2.044175 |
| 112 | 6  | 0 | 12.005826  | 3.658557  | -0.525357 |
| 113 | 1  | 0 | 12.158472  | 3.560700  | 0.559007  |
| 114 | 1  | 0 | 11.712270  | 4.703823  | -0.698285 |
| 115 | 6  | 0 | 13.323093  | 3.371666  | -1.253591 |
| 116 | 1  | 0 | 14.119798  | 4.047645  | -0.921979 |
| 117 | 1  | 0 | 13.660275  | 2.343677  | -1.071085 |
| 118 | 1  | 0 | 13.210855  | 3.494982  | -2.338034 |
| 119 | 1  | 0 | 3.618555   | -2.881628 | -4.278997 |
| 120 | 6  | 0 | -2.066006  | 3.369206  | 0.545412  |
| 121 | 6  | 0 | -1.677396  | 4.436743  | 1.327292  |
| 122 | 16 | 0 | -3.819047  | 3.273145  | 0.485615  |
| 123 | 6  | 0 | -2.758100  | 5.181233  | 1.859842  |



|     |    |   |           |           |           |
|-----|----|---|-----------|-----------|-----------|
| 124 | 1  | 0 | -0.639626 | 4.703480  | 1.492829  |
| 125 | 6  | 0 | -3.998445 | 4.695783  | 1.496359  |
| 126 | 1  | 0 | -2.627212 | 6.065505  | 2.474274  |
| 127 | 6  | 0 | -5.312742 | 5.194990  | 1.844071  |
| 128 | 6  | 0 | -6.530867 | 4.914840  | 1.260078  |
| 129 | 16 | 0 | -5.526442 | 6.317543  | 3.180685  |
| 130 | 6  | 0 | -7.623619 | 5.594611  | 1.869193  |
| 131 | 1  | 0 | -6.637617 | 4.254113  | 0.406141  |
| 132 | 6  | 0 | -7.239784 | 6.391600  | 2.913221  |
| 133 | 1  | 0 | -8.651582 | 5.498918  | 1.537492  |
| 134 | 1  | 0 | -7.854746 | 7.018863  | 3.544513  |
| 135 | 6  | 0 | 4.622852  | 2.346626  | -0.497566 |
| 136 | 6  | 0 | -2.820127 | -2.299046 | -3.197928 |
| 137 | 1  | 0 | -2.505280 | -3.335853 | -3.318879 |
| 138 | 1  | 0 | -3.104164 | -1.897715 | -4.172715 |
| 139 | 1  | 0 | 4.370881  | 2.811315  | 0.456028  |
| 140 | 1  | 0 | 4.799159  | 3.128379  | -1.238664 |

**Table S2X.** Cartesian coordinates of optimized geometry of **PBPI-unit-1** in CH<sub>2</sub>Cl<sub>2</sub> solution (DFT, B3LYP/6-31g\*)

Standard orientation: (Ground State)

| Center Number | Atomic Number | Atomic Type | Coordinates (Angstroms) |           |           |
|---------------|---------------|-------------|-------------------------|-----------|-----------|
|               |               |             | X                       | Y         | Z         |
| 1             | 6             | 0           | 1.495814                | -1.575502 | -1.106907 |
| 2             | 6             | 0           | 1.189403                | -2.740477 | -0.368869 |
| 3             | 6             | 0           | 2.157236                | -3.736011 | -0.171452 |
| 4             | 6             | 0           | 3.407730                | -3.643468 | -0.767704 |
| 5             | 6             | 0           | 3.715261                | -2.517727 | -1.521997 |
| 6             | 6             | 0           | 2.794553                | -1.469347 | -1.654221 |
| 7             | 6             | 0           | 0.493428                | -0.519430 | -1.343652 |
| 8             | 6             | 0           | -0.854449               | -0.839775 | -1.626829 |
| 9             | 6             | 0           | -1.776591               | 0.156889  | -1.956471 |
| 10            | 6             | 0           | -1.440020               | 1.515535  | -1.931362 |
| 11            | 6             | 0           | -0.121072               | 1.835471  | -1.584801 |
| 12            | 6             | 0           | 0.840995                | 0.851543  | -1.342701 |
| 13            | 1             | 0           | 1.900356                | -4.593464 | 0.439718  |

|    |   |   |           |           |           |
|----|---|---|-----------|-----------|-----------|
| 14 | 1 | 0 | 4.682008  | -2.424492 | -2.003098 |
| 15 | 1 | 0 | -2.776251 | -0.154403 | -2.237613 |
| 16 | 1 | 0 | 0.181142  | 2.871492  | -1.496178 |
| 17 | 6 | 0 | 2.197520  | 1.444906  | -1.056330 |
| 18 | 6 | 0 | 3.358724  | -0.288320 | -2.392200 |
| 19 | 8 | 0 | 2.272546  | 2.467214  | -0.386727 |
| 20 | 8 | 0 | 4.032656  | -0.447991 | -3.396599 |
| 21 | 6 | 0 | -1.477789 | -2.209619 | -1.618641 |
| 22 | 6 | 0 | -0.123489 | -3.074144 | 0.282800  |
| 23 | 8 | 0 | -0.141670 | -3.583922 | 1.394296  |
| 24 | 8 | 0 | -2.315324 | -2.511406 | -2.456496 |
| 25 | 7 | 0 | 3.310225  | 0.964637  | -1.747062 |
| 26 | 7 | 0 | -1.285513 | -3.021935 | -0.493253 |
| 27 | 6 | 0 | -3.643936 | -3.307579 | 0.434317  |
| 28 | 1 | 0 | -4.024890 | -2.594880 | -0.311002 |
| 29 | 6 | 0 | 5.679465  | 1.804641  | -1.137225 |
| 30 | 1 | 0 | 6.362391  | 2.541791  | -1.589480 |
| 31 | 6 | 0 | -3.313243 | -2.529731 | 1.723769  |
| 32 | 1 | 0 | -2.890853 | -3.228361 | 2.459797  |
| 33 | 1 | 0 | -2.516571 | -1.806648 | 1.503486  |
| 34 | 6 | 0 | -4.487700 | -1.772783 | 2.359286  |
| 35 | 1 | 0 | -5.268073 | -2.480805 | 2.669818  |
| 36 | 1 | 0 | -4.950221 | -1.113771 | 1.609513  |
| 37 | 6 | 0 | 6.352148  | 0.422576  | -1.269149 |
| 38 | 1 | 0 | 6.433773  | 0.167538  | -2.333911 |
| 39 | 1 | 0 | 5.696588  | -0.336844 | -0.818391 |
| 40 | 6 | 0 | -4.718416 | -4.410720 | 0.635427  |
| 41 | 1 | 0 | -4.447050 | -5.300867 | 0.049553  |
| 42 | 1 | 0 | -4.713679 | -4.735691 | 1.685533  |
| 43 | 6 | 0 | -6.140560 | -3.996282 | 0.227074  |
| 44 | 1 | 0 | -6.441718 | -3.095574 | 0.777726  |
| 45 | 1 | 0 | -6.136013 | -3.715094 | -0.836233 |
| 46 | 6 | 0 | 5.438198  | 2.234181  | 0.335905  |
| 47 | 1 | 0 | 4.457670  | 2.712786  | 0.418812  |
| 48 | 1 | 0 | 5.391360  | 1.341756  | 0.976763  |
| 49 | 6 | 0 | 6.496989  | 3.202465  | 0.888555  |
| 50 | 1 | 0 | 7.497286  | 2.754623  | 0.817048  |
| 51 | 1 | 0 | 6.521847  | 4.101241  | 0.254122  |
| 52 | 6 | 0 | 7.742233  | 0.304031  | -0.627760 |

|    |   |   |            |           |           |
|----|---|---|------------|-----------|-----------|
| 53 | 1 | 0 | 7.674056   | 0.483572  | 0.453436  |
| 54 | 1 | 0 | 8.400176   | 1.088263  | -1.030376 |
| 55 | 6 | 0 | -4.063810  | -0.936241 | 3.574496  |
| 56 | 1 | 0 | -3.294199  | -0.213223 | 3.266035  |
| 57 | 1 | 0 | -3.584145  | -1.592328 | 4.316085  |
| 58 | 6 | 0 | -5.225418  | -0.186362 | 4.239465  |
| 59 | 1 | 0 | -5.992627  | -0.910107 | 4.552792  |
| 60 | 1 | 0 | -5.708437  | 0.466806  | 3.497419  |
| 61 | 6 | 0 | -4.797122  | 0.653306  | 5.450000  |
| 62 | 1 | 0 | -4.032068  | 1.378675  | 5.135280  |
| 63 | 1 | 0 | -4.310425  | 0.000387  | 6.189932  |
| 64 | 6 | 0 | -5.956400  | 1.401080  | 6.121137  |
| 65 | 1 | 0 | -6.721054  | 0.676479  | 6.439125  |
| 66 | 1 | 0 | -6.444960  | 2.053539  | 5.381860  |
| 67 | 6 | 0 | -5.525461  | 2.242694  | 7.329286  |
| 68 | 1 | 0 | -4.761878  | 2.966866  | 7.011090  |
| 69 | 1 | 0 | -5.037534  | 1.591167  | 8.068284  |
| 70 | 6 | 0 | -6.688149  | 2.986835  | 7.994353  |
| 71 | 1 | 0 | -6.347174  | 3.578899  | 8.851632  |
| 72 | 1 | 0 | -7.175046  | 3.671553  | 7.288684  |
| 73 | 1 | 0 | -7.451829  | 2.286629  | 8.355294  |
| 74 | 6 | 0 | -7.181473  | -5.099964 | 0.454820  |
| 75 | 1 | 0 | -6.881114  | -6.003160 | -0.097187 |
| 76 | 1 | 0 | -7.186022  | -5.381008 | 1.518623  |
| 77 | 6 | 0 | -8.599998  | -4.696288 | 0.032273  |
| 78 | 1 | 0 | -8.899734  | -3.792577 | 0.583820  |
| 79 | 1 | 0 | -8.596101  | -4.415582 | -1.031632 |
| 80 | 6 | 0 | -9.645603  | -5.795674 | 0.259764  |
| 81 | 1 | 0 | -9.648973  | -6.077313 | 1.322477  |
| 82 | 1 | 0 | -9.348137  | -6.698016 | -0.293358 |
| 83 | 6 | 0 | -11.059094 | -5.380943 | -0.162170 |
| 84 | 1 | 0 | -11.782293 | -6.185847 | 0.013264  |
| 85 | 1 | 0 | -11.396701 | -4.500683 | 0.398999  |
| 86 | 1 | 0 | -11.095202 | -5.126591 | -1.228844 |
| 87 | 6 | 0 | 8.387791   | -1.068418 | -0.864196 |
| 88 | 1 | 0 | 8.478737   | -1.245227 | -1.946146 |
| 89 | 1 | 0 | 7.718475   | -1.853961 | -0.482428 |
| 90 | 6 | 0 | 9.766380   | -1.218029 | -0.207565 |
| 91 | 1 | 0 | 9.672418   | -1.045127 | 0.874874  |

|     |    |   |           |           |           |
|-----|----|---|-----------|-----------|-----------|
| 92  | 1  | 0 | 10.435925 | -0.430582 | -0.584527 |
| 93  | 6  | 0 | 10.412241 | -2.588993 | -0.446674 |
| 94  | 1  | 0 | 10.514581 | -2.757958 | -1.529025 |
| 95  | 1  | 0 | 9.737588  | -3.376399 | -0.078469 |
| 96  | 6  | 0 | 11.783971 | -2.746328 | 0.222075  |
| 97  | 1  | 0 | 11.681344 | -2.579348 | 1.304855  |
| 98  | 1  | 0 | 12.459963 | -1.959011 | -0.144047 |
| 99  | 6  | 0 | 12.429801 | -4.117150 | -0.017670 |
| 100 | 1  | 0 | 12.536593 | -4.282418 | -1.099309 |
| 101 | 1  | 0 | 11.752936 | -4.903954 | 0.345014  |
| 102 | 6  | 0 | 13.796308 | -4.268056 | 0.658923  |
| 103 | 1  | 0 | 14.230805 | -5.256423 | 0.469204  |
| 104 | 1  | 0 | 14.505193 | -3.515765 | 0.291036  |
| 105 | 1  | 0 | 13.715536 | -4.142131 | 1.745843  |
| 106 | 6  | 0 | 6.232703  | 3.620398  | 2.340881  |
| 107 | 1  | 0 | 5.232068  | 4.072406  | 2.410993  |
| 108 | 1  | 0 | 6.206138  | 2.724034  | 2.978513  |
| 109 | 6  | 0 | 7.272615  | 4.603750  | 2.893289  |
| 110 | 1  | 0 | 8.272305  | 4.147691  | 2.833544  |
| 111 | 1  | 0 | 7.306996  | 5.495855  | 2.249927  |
| 112 | 6  | 0 | 7.001581  | 5.036916  | 4.339926  |
| 113 | 1  | 0 | 6.964698  | 4.146390  | 4.983601  |
| 114 | 1  | 0 | 6.004359  | 5.495984  | 4.398593  |
| 115 | 6  | 0 | 8.046719  | 6.016860  | 4.883290  |
| 116 | 1  | 0 | 7.823697  | 6.309084  | 5.916038  |
| 117 | 1  | 0 | 9.049856  | 5.572561  | 4.871620  |
| 118 | 1  | 0 | 8.083440  | 6.931488  | 4.278358  |
| 119 | 1  | 0 | 4.136613  | -4.437825 | -0.643508 |
| 120 | 6  | 0 | -2.407523 | 2.565668  | -2.245752 |
| 121 | 6  | 0 | -2.164403 | 3.874229  | -2.608641 |
| 122 | 16 | 0 | -4.137004 | 2.267128  | -2.198437 |
| 123 | 6  | 0 | -3.336341 | 4.625977  | -2.867884 |
| 124 | 1  | 0 | -1.165531 | 4.280118  | -2.723989 |
| 125 | 6  | 0 | -4.502980 | 3.906726  | -2.699625 |
| 126 | 1  | 0 | -3.325655 | 5.658150  | -3.199307 |
| 127 | 6  | 0 | -5.865832 | 4.373519  | -2.867576 |
| 128 | 6  | 0 | -6.324549 | 5.672894  | -2.796335 |
| 129 | 16 | 0 | -7.192525 | 3.282329  | -3.237360 |
| 130 | 6  | 0 | -7.723295 | 5.794096  | -3.032034 |

|     |   |   |           |           |           |
|-----|---|---|-----------|-----------|-----------|
| 131 | 1 | 0 | -5.678551 | 6.511070  | -2.559566 |
| 132 | 6 | 0 | -8.330364 | 4.591616  | -3.275527 |
| 133 | 1 | 0 | -8.257324 | 6.737736  | -3.010150 |
| 134 | 1 | 0 | -9.374349 | 4.390604  | -3.474971 |
| 135 | 6 | 0 | -2.383935 | -3.966726 | -0.164974 |
| 136 | 6 | 0 | 4.419694  | 1.922114  | -2.028273 |
| 137 | 1 | 0 | -1.966972 | -4.692878 | 0.533254  |
| 138 | 1 | 0 | -2.642539 | -4.475803 | -1.095255 |
| 139 | 1 | 0 | 3.992601  | 2.920631  | -1.929586 |
| 140 | 1 | 0 | 4.691303  | 1.757895  | -3.072195 |

**Table S3X.** Cartesian coordinates of optimized geometry of **PBPI-unit-2Li** in CH<sub>2</sub>Cl<sub>2</sub> solution (DFT, B3LYP/6-31g\*)

Standard orientation: (Ground State)

| Center<br>Number | Atomic<br>Number | Atomic<br>Type | Coordinates (Angstroms) |           |           |
|------------------|------------------|----------------|-------------------------|-----------|-----------|
|                  |                  |                | X                       | Y         | Z         |
| 1                | 6                | 0              | 0.204840                | -1.445572 | -2.587602 |
| 2                | 6                | 0              | -0.013316               | -0.455513 | -3.666990 |
| 3                | 6                | 0              | -0.357918               | -0.934141 | -4.942069 |
| 4                | 6                | 0              | -0.719692               | -2.260332 | -5.169886 |
| 5                | 6                | 0              | -0.908757               | -3.091621 | -4.055610 |
| 6                | 6                | 0              | -0.569242               | -2.693611 | -2.762713 |
| 7                | 6                | 0              | 1.162679                | -1.299053 | -1.622136 |
| 8                | 6                | 0              | 2.187580                | -0.233577 | -1.649143 |
| 9                | 6                | 0              | 3.476169                | -0.531921 | -1.227966 |
| 10               | 6                | 0              | 3.814542                | -1.742601 | -0.577361 |
| 11               | 6                | 0              | 2.716382                | -2.532918 | -0.150323 |
| 12               | 6                | 0              | 1.412781                | -2.293060 | -0.557293 |
| 13               | 1                | 0              | -0.354070               | -0.231857 | -5.774252 |
| 14               | 1                | 0              | -1.383187               | -4.061713 | -4.173259 |
| 15               | 1                | 0              | 4.227535                | 0.242916  | -1.360587 |
| 16               | 1                | 0              | 2.890185                | -3.335940 | 0.562672  |
| 17               | 6                | 0              | 0.352760                | -2.910494 | 0.232736  |
| 18               | 6                | 0              | -1.012864               | -3.565339 | -1.698641 |
| 19               | 8                | 0              | 0.550235                | -3.251826 | 1.437644  |
| 20               | 8                | 0              | -1.568334               | -4.657406 | -1.859078 |
| 21               | 6                | 0              | 1.943425                | 1.138657  | -2.046163 |

|    |   |   |           |           |           |
|----|---|---|-----------|-----------|-----------|
| 22 | 6 | 0 | -0.020505 | 0.969267  | -3.472321 |
| 23 | 8 | 0 | -0.581830 | 1.763925  | -4.294807 |
| 24 | 8 | 0 | 2.803462  | 2.024548  | -2.088015 |
| 25 | 7 | 0 | -0.899430 | -3.094109 | -0.315489 |
| 26 | 7 | 0 | 0.565862  | 1.522393  | -2.327887 |
| 27 | 6 | 0 | 0.349124  | 3.272384  | -0.527325 |
| 28 | 1 | 0 | 1.376729  | 3.056954  | -0.206415 |
| 29 | 6 | 0 | -3.376722 | -3.062430 | 0.152602  |
| 30 | 1 | 0 | -3.555238 | -3.422609 | -0.868588 |
| 31 | 6 | 0 | -0.611212 | 2.393842  | 0.299218  |
| 32 | 1 | 0 | -1.645596 | 2.627430  | 0.001099  |
| 33 | 1 | 0 | -0.445487 | 1.344151  | 0.023924  |
| 34 | 6 | 0 | -0.488709 | 2.527810  | 1.823381  |
| 35 | 1 | 0 | -0.722012 | 3.555611  | 2.133292  |
| 36 | 1 | 0 | 0.555364  | 2.348182  | 2.121736  |
| 37 | 6 | 0 | -3.470114 | -1.515638 | 0.156594  |
| 38 | 1 | 0 | -2.457797 | -1.092993 | 0.108240  |
| 39 | 1 | 0 | -3.896856 | -1.177800 | 1.112977  |
| 40 | 6 | 0 | 0.098641  | 4.793060  | -0.336359 |
| 41 | 1 | 0 | 0.189065  | 5.304408  | -1.305793 |
| 42 | 1 | 0 | -0.939345 | 4.956150  | -0.011057 |
| 43 | 6 | 0 | 1.057624  | 5.480927  | 0.647887  |
| 44 | 1 | 0 | 1.015775  | 4.979531  | 1.624162  |
| 45 | 1 | 0 | 2.088492  | 5.354129  | 0.286100  |
| 46 | 6 | 0 | -4.414840 | -3.742064 | 1.072512  |
| 47 | 1 | 0 | -4.242400 | -4.827983 | 1.047752  |
| 48 | 1 | 0 | -4.228812 | -3.428441 | 2.111681  |
| 49 | 6 | 0 | -5.887544 | -3.479736 | 0.729574  |
| 50 | 1 | 0 | -6.110995 | -2.408750 | 0.826437  |
| 51 | 1 | 0 | -6.068144 | -3.738548 | -0.324090 |
| 52 | 6 | 0 | -4.280722 | -0.921713 | -1.006766 |
| 53 | 1 | 0 | -5.279893 | -1.375204 | -1.043618 |
| 54 | 1 | 0 | -3.787736 | -1.194715 | -1.951569 |
| 55 | 6 | 0 | -1.406014 | 1.560675  | 2.584772  |
| 56 | 1 | 0 | -1.179172 | 0.528328  | 2.277325  |
| 57 | 1 | 0 | -2.449486 | 1.740276  | 2.286214  |
| 58 | 6 | 0 | -1.291335 | 1.673224  | 4.110591  |
| 59 | 1 | 0 | -1.523497 | 2.704113  | 4.416461  |
| 60 | 1 | 0 | -0.247343 | 1.496565  | 4.411356  |

|    |   |   |           |           |           |
|----|---|---|-----------|-----------|-----------|
| 61 | 6 | 0 | -2.207794 | 0.703235  | 4.867968  |
| 62 | 1 | 0 | -1.976895 | -0.328786 | 4.562219  |
| 63 | 1 | 0 | -3.250874 | 0.881383  | 4.567017  |
| 64 | 6 | 0 | -2.096241 | 0.814694  | 6.393934  |
| 65 | 1 | 0 | -2.329677 | 1.845238  | 6.700616  |
| 66 | 1 | 0 | -1.053234 | 0.637027  | 6.697004  |
| 67 | 6 | 0 | -3.013217 | -0.156127 | 7.149265  |
| 68 | 1 | 0 | -2.780567 | -1.186206 | 6.842960  |
| 69 | 1 | 0 | -4.055151 | 0.022550  | 6.847632  |
| 70 | 6 | 0 | -2.895922 | -0.038278 | 8.672453  |
| 71 | 1 | 0 | -3.562881 | -0.743758 | 9.181403  |
| 72 | 1 | 0 | -1.872142 | -0.245729 | 9.008147  |
| 73 | 1 | 0 | -3.156667 | 0.971728  | 9.012388  |
| 74 | 6 | 0 | 0.767026  | 6.975473  | 0.835722  |
| 75 | 1 | 0 | 0.808582  | 7.479560  | -0.141557 |
| 76 | 1 | 0 | -0.263956 | 7.102065  | 1.199264  |
| 77 | 6 | 0 | 1.733038  | 7.669698  | 1.804592  |
| 78 | 1 | 0 | 1.693401  | 7.164432  | 2.781405  |
| 79 | 1 | 0 | 2.763999  | 7.546199  | 1.440565  |
| 80 | 6 | 0 | 1.442231  | 9.163536  | 1.998202  |
| 81 | 1 | 0 | 0.411892  | 9.287292  | 2.361451  |
| 82 | 1 | 0 | 1.483864  | 9.669390  | 1.022979  |
| 83 | 6 | 0 | 2.410757  | 9.847187  | 2.969046  |
| 84 | 1 | 0 | 2.176822  | 10.911779 | 3.085820  |
| 85 | 1 | 0 | 2.366601  | 9.384967  | 3.963170  |
| 86 | 1 | 0 | 3.446268  | 9.770117  | 2.614766  |
| 87 | 6 | 0 | -4.423677 | 0.603460  | -0.928955 |
| 88 | 1 | 0 | -3.423914 | 1.059902  | -0.885113 |
| 89 | 1 | 0 | -4.922072 | 0.872682  | 0.014454  |
| 90 | 6 | 0 | -5.206549 | 1.210208  | -2.100758 |
| 91 | 1 | 0 | -6.205163 | 0.751148  | -2.148246 |
| 92 | 1 | 0 | -4.707662 | 0.944428  | -3.045991 |
| 93 | 6 | 0 | -5.354464 | 2.735024  | -2.015744 |
| 94 | 1 | 0 | -4.355934 | 3.194502  | -1.958609 |
| 95 | 1 | 0 | -5.861613 | 2.996142  | -1.075182 |
| 96 | 6 | 0 | -6.126972 | 3.347392  | -3.191153 |
| 97 | 1 | 0 | -7.124374 | 2.886801  | -3.250190 |
| 98 | 1 | 0 | -5.619623 | 3.091617  | -4.134612 |
| 99 | 6 | 0 | -6.279397 | 4.871270  | -3.099648 |

|     |    |   |            |           |           |
|-----|----|---|------------|-----------|-----------|
| 100 | 1  | 0 | -5.282941  | 5.331777  | -3.037091 |
| 101 | 1  | 0 | -6.791431  | 5.126351  | -2.161024 |
| 102 | 6  | 0 | -7.047576  | 5.475049  | -4.279878 |
| 103 | 1  | 0 | -7.139380  | 6.563016  | -4.183402 |
| 104 | 1  | 0 | -6.541258  | 5.266522  | -5.230842 |
| 105 | 1  | 0 | -8.060649  | 5.059391  | -4.346946 |
| 106 | 6  | 0 | -6.858726  | -4.271242 | 1.616514  |
| 107 | 1  | 0 | -6.646199  | -5.346150 | 1.517799  |
| 108 | 1  | 0 | -6.674110  | -4.020253 | 2.671867  |
| 109 | 6  | 0 | -8.334751  | -4.014783 | 1.286220  |
| 110 | 1  | 0 | -8.548906  | -2.940156 | 1.387896  |
| 111 | 1  | 0 | -8.518695  | -4.262547 | 0.229995  |
| 112 | 6  | 0 | -9.308851  | -4.808217 | 2.166673  |
| 113 | 1  | 0 | -9.126292  | -4.560656 | 3.222198  |
| 114 | 1  | 0 | -9.095744  | -5.881889 | 2.064671  |
| 115 | 6  | 0 | -10.780145 | -4.546019 | 1.828306  |
| 116 | 1  | 0 | -11.449628 | -5.126776 | 2.473425  |
| 117 | 1  | 0 | -11.032455 | -3.485664 | 1.954304  |
| 118 | 1  | 0 | -11.001258 | -4.816876 | 0.788333  |
| 119 | 1  | 0 | -0.964538  | -2.607830 | -6.168911 |
| 120 | 6  | 0 | 5.168950   | -2.092745 | -0.206768 |
| 121 | 6  | 0 | 5.654776   | -3.287254 | 0.307221  |
| 122 | 16 | 0 | 6.504062   | -0.942117 | -0.362771 |
| 123 | 6  | 0 | 7.044667   | -3.284451 | 0.575341  |
| 124 | 1  | 0 | 5.028873   | -4.160745 | 0.453948  |
| 125 | 6  | 0 | 7.681417   | -2.098916 | 0.269736  |
| 126 | 1  | 0 | 7.571580   | -4.148534 | 0.969260  |
| 127 | 6  | 0 | 9.074662   | -1.743054 | 0.393534  |
| 128 | 6  | 0 | 9.716401   | -0.574815 | 0.030001  |
| 129 | 16 | 0 | 10.238328  | -2.867122 | 1.097667  |
| 130 | 6  | 0 | 11.114887  | -0.577528 | 0.305408  |
| 131 | 1  | 0 | 9.199410   | 0.262249  | -0.427467 |
| 132 | 6  | 0 | 11.548540  | -1.739955 | 0.878914  |
| 133 | 1  | 0 | 11.770955  | 0.257052  | 0.081436  |
| 134 | 1  | 0 | 12.548723  | -2.012517 | 1.187410  |
| 135 | 6  | 0 | -1.979129  | -3.552676 | 0.581212  |
| 136 | 6  | 0 | 0.254709   | 2.932698  | -2.030089 |
| 137 | 1  | 0 | -0.763216  | 3.110775  | -2.383655 |
| 138 | 1  | 0 | 0.919400   | 3.594957  | -2.595068 |



|     |   |   |           |           |           |
|-----|---|---|-----------|-----------|-----------|
| 139 | 1 | 0 | -1.740047 | -3.167873 | 1.574019  |
| 140 | 1 | 0 | -1.969096 | -4.645977 | 0.639001  |
| 141 | 3 | 0 | -2.089853 | 1.591245  | -5.310815 |
| 142 | 3 | 0 | 1.691894  | -2.374132 | 2.617284  |

**Table S4X.** Cartesian coordinates of optimized geometry of **PBPI-unit-4Li** in CH<sub>2</sub>Cl<sub>2</sub> solution (DFT, B3LYP/6-31g\*)

Standard orientation: (Ground State)

| Center Number | Atomic Number | Atomic Type | Coordinates (Angstroms) |           |           |
|---------------|---------------|-------------|-------------------------|-----------|-----------|
|               |               |             | X                       | Y         | Z         |
| 1             | 6             | 0           | 0.031861                | -1.190205 | -2.517251 |
| 2             | 6             | 0           | -0.269502               | -0.171971 | -3.519759 |
| 3             | 6             | 0           | -0.610638               | -0.608300 | -4.888749 |
| 4             | 6             | 0           | -0.647747               | -1.985801 | -5.162292 |
| 5             | 6             | 0           | -0.688547               | -2.947031 | -4.158529 |
| 6             | 6             | 0           | -0.565856               | -2.536396 | -2.739098 |
| 7             | 6             | 0           | 1.021295                | -1.003795 | -1.560632 |
| 8             | 6             | 0           | 1.988387                | 0.117702  | -1.599028 |
| 9             | 6             | 0           | 3.339876                | -0.172135 | -1.334358 |
| 10            | 6             | 0           | 3.753956                | -1.369828 | -0.736322 |
| 11            | 6             | 0           | 2.712705                | -2.246824 | -0.263908 |
| 12            | 6             | 0           | 1.390681                | -2.050363 | -0.609764 |
| 13            | 1             | 0           | -0.322112               | 0.058416  | -5.707634 |
| 14            | 1             | 0           | -0.423165               | -3.976350 | -4.428399 |
| 15            | 1             | 0           | 4.069528                | 0.603378  | -1.560162 |
| 16            | 1             | 0           | 2.974926                | -3.068348 | 0.401889  |
| 17            | 6             | 0           | 0.333725                | -2.701297 | 0.220681  |
| 18            | 6             | 0           | -0.918906               | -3.444190 | -1.774332 |
| 19            | 8             | 0           | 0.494900                | -2.725148 | 1.482334  |
| 20            | 8             | 0           | -1.445275               | -4.628734 | -2.010089 |
| 21            | 6             | 0           | 1.589178                | 1.429036  | -1.951539 |
| 22            | 6             | 0           | -0.267814               | 1.205944  | -3.242302 |
| 23            | 8             | 0           | -0.646299               | 2.103297  | -4.114512 |
| 24            | 8             | 0           | 2.390250                | 2.390295  | -2.250117 |
| 25            | 7             | 0           | -0.797963               | -3.148998 | -0.346823 |
| 26            | 7             | 0           | 0.160175                | 1.657207  | -1.941583 |

|    |   |   |           |           |           |
|----|---|---|-----------|-----------|-----------|
| 27 | 6 | 0 | -0.018381 | 3.318430  | -0.072715 |
| 28 | 1 | 0 | 1.050450  | 3.144431  | 0.123070  |
| 29 | 6 | 0 | -3.289385 | -3.094654 | 0.094305  |
| 30 | 1 | 0 | -3.479436 | -3.473825 | -0.917926 |
| 31 | 6 | 0 | -0.843330 | 2.385588  | 0.845639  |
| 32 | 1 | 0 | -1.811013 | 2.859281  | 1.072352  |
| 33 | 1 | 0 | -1.068976 | 1.469617  | 0.285244  |
| 34 | 6 | 0 | -0.154803 | 1.976794  | 2.157394  |
| 35 | 1 | 0 | 0.122713  | 2.863850  | 2.741188  |
| 36 | 1 | 0 | 0.792231  | 1.471477  | 1.912301  |
| 37 | 6 | 0 | -3.351514 | -1.548329 | 0.059913  |
| 38 | 1 | 0 | -2.334195 | -1.151071 | -0.051405 |
| 39 | 1 | 0 | -3.726462 | -1.172398 | 1.024150  |
| 40 | 6 | 0 | -0.299781 | 4.820219  | 0.151915  |
| 41 | 1 | 0 | 0.300767  | 5.393635  | -0.570516 |
| 42 | 1 | 0 | -1.351771 | 5.022791  | -0.104289 |
| 43 | 6 | 0 | -0.018501 | 5.375135  | 1.554870  |
| 44 | 1 | 0 | -0.679108 | 4.894912  | 2.288908  |
| 45 | 1 | 0 | 1.009720  | 5.120028  | 1.851647  |
| 46 | 6 | 0 | -4.325400 | -3.736094 | 1.043863  |
| 47 | 1 | 0 | -4.164380 | -4.824553 | 1.047871  |
| 48 | 1 | 0 | -4.121858 | -3.396884 | 2.071540  |
| 49 | 6 | 0 | -5.801500 | -3.470203 | 0.718556  |
| 50 | 1 | 0 | -6.014989 | -2.395632 | 0.793700  |
| 51 | 1 | 0 | -6.003117 | -3.752196 | -0.325683 |
| 52 | 6 | 0 | -4.200024 | -0.972406 | -1.085804 |
| 53 | 1 | 0 | -5.220270 | -1.376377 | -1.047274 |
| 54 | 1 | 0 | -3.769374 | -1.314245 | -2.038317 |
| 55 | 6 | 0 | -1.015740 | 1.052744  | 3.029258  |
| 56 | 1 | 0 | -1.302349 | 0.164667  | 2.446392  |
| 57 | 1 | 0 | -1.955678 | 1.566564  | 3.280166  |
| 58 | 6 | 0 | -0.326599 | 0.607801  | 4.325911  |
| 59 | 1 | 0 | -0.033521 | 1.495640  | 4.905814  |
| 60 | 1 | 0 | 0.612900  | 0.086854  | 4.079721  |
| 61 | 6 | 0 | -1.193798 | -0.306032 | 5.201509  |
| 62 | 1 | 0 | -1.491775 | -1.190521 | 4.618817  |
| 63 | 1 | 0 | -2.126546 | 0.218858  | 5.455908  |
| 64 | 6 | 0 | -0.501491 | -0.760342 | 6.492809  |
| 65 | 1 | 0 | -0.197830 | 0.123691  | 7.073401  |

|     |   |   |           |           |           |
|-----|---|---|-----------|-----------|-----------|
| 66  | 1 | 0 | 0.428837  | -1.291893 | 6.239643  |
| 67  | 6 | 0 | -1.374240 | -1.665690 | 7.371689  |
| 68  | 1 | 0 | -1.677769 | -2.548803 | 6.791558  |
| 69  | 1 | 0 | -2.302652 | -1.134832 | 7.626242  |
| 70  | 6 | 0 | -0.675025 | -2.116025 | 8.658541  |
| 71  | 1 | 0 | -1.324397 | -2.759847 | 9.262993  |
| 72  | 1 | 0 | 0.239417  | -2.679984 | 8.435798  |
| 73  | 1 | 0 | -0.390256 | -1.255235 | 9.276404  |
| 74  | 6 | 0 | -0.205873 | 6.896467  | 1.641931  |
| 75  | 1 | 0 | 0.462252  | 7.386334  | 0.917693  |
| 76  | 1 | 0 | -1.230003 | 7.153733  | 1.332241  |
| 77  | 6 | 0 | 0.057640  | 7.468996  | 3.040468  |
| 78  | 1 | 0 | -0.611954 | 6.981630  | 3.765039  |
| 79  | 1 | 0 | 1.081174  | 7.211483  | 3.351974  |
| 80  | 6 | 0 | -0.127861 | 8.989530  | 3.126693  |
| 81  | 1 | 0 | -1.150524 | 9.247093  | 2.815937  |
| 82  | 1 | 0 | 0.541621  | 9.477022  | 2.403549  |
| 83  | 6 | 0 | 0.136819  | 9.552988  | 4.526791  |
| 84  | 1 | 0 | -0.003885 | 10.639781 | 4.554887  |
| 85  | 1 | 0 | -0.541485 | 9.109643  | 5.266487  |
| 86  | 1 | 0 | 1.163319  | 9.341079  | 4.851148  |
| 87  | 6 | 0 | -4.265184 | 0.560039  | -1.089041 |
| 88  | 1 | 0 | -3.243067 | 0.964062  | -1.120883 |
| 89  | 1 | 0 | -4.703011 | 0.909967  | -0.142037 |
| 90  | 6 | 0 | -5.072877 | 1.133104  | -2.261303 |
| 91  | 1 | 0 | -6.098996 | 0.737364  | -2.226200 |
| 92  | 1 | 0 | -4.642356 | 0.768998  | -3.207484 |
| 93  | 6 | 0 | -5.122163 | 2.666347  | -2.286713 |
| 94  | 1 | 0 | -4.095177 | 3.061648  | -2.309940 |
| 95  | 1 | 0 | -5.565897 | 3.030418  | -1.348200 |
| 96  | 6 | 0 | -5.909712 | 3.236712  | -3.473259 |
| 97  | 1 | 0 | -6.937313 | 2.843959  | -3.450726 |
| 98  | 1 | 0 | -5.466795 | 2.871650  | -4.413153 |
| 99  | 6 | 0 | -5.955550 | 4.769890  | -3.502131 |
| 100 | 1 | 0 | -4.928474 | 5.161829  | -3.523297 |
| 101 | 1 | 0 | -6.401383 | 5.135282  | -2.566082 |
| 102 | 6 | 0 | -6.739997 | 5.329603  | -4.693401 |
| 103 | 1 | 0 | -6.754066 | 6.425646  | -4.684762 |
| 104 | 1 | 0 | -6.297005 | 5.009475  | -5.644908 |

|     |    |   |            |           |           |
|-----|----|---|------------|-----------|-----------|
| 105 | 1  | 0 | -7.780711  | 4.982534  | -4.680278 |
| 106 | 6  | 0 | -6.763013  | -4.232083 | 1.641431  |
| 107 | 1  | 0 | -6.561977  | -5.311056 | 1.564211  |
| 108 | 1  | 0 | -6.555282  | -3.958457 | 2.686775  |
| 109 | 6  | 0 | -8.243124  | -3.969701 | 1.335049  |
| 110 | 1  | 0 | -8.445108  | -2.890833 | 1.413741  |
| 111 | 1  | 0 | -8.451767  | -4.242199 | 0.289466  |
| 112 | 6  | 0 | -9.205728  | -4.730880 | 2.255773  |
| 113 | 1  | 0 | -8.998199  | -4.458296 | 3.300434  |
| 114 | 1  | 0 | -9.004891  | -5.808908 | 2.177071  |
| 115 | 6  | 0 | -10.681473 | -4.462833 | 1.942313  |
| 116 | 1  | 0 | -11.342263 | -5.020046 | 2.616527  |
| 117 | 1  | 0 | -10.920909 | -3.397124 | 2.046176  |
| 118 | 1  | 0 | -10.927785 | -4.758083 | 0.914688  |
| 119 | 1  | 0 | -0.618130  | -2.315266 | -6.203063 |
| 120 | 6  | 0 | 5.141991   | -1.680255 | -0.468442 |
| 121 | 6  | 0 | 5.704198   | -2.873866 | -0.036030 |
| 122 | 16 | 0 | 6.424578   | -0.473094 | -0.658670 |
| 123 | 6  | 0 | 7.108470   | -2.831422 | 0.135870  |
| 124 | 1  | 0 | 5.119685   | -3.774012 | 0.118769  |
| 125 | 6  | 0 | 7.682607   | -1.612007 | -0.160998 |
| 126 | 1  | 0 | 7.690270   | -3.691078 | 0.455353  |
| 127 | 6  | 0 | 9.067620   | -1.210560 | -0.115585 |
| 128 | 6  | 0 | 9.645807   | -0.011779 | -0.487771 |
| 129 | 16 | 0 | 10.311050  | -2.308574 | 0.486786  |
| 130 | 6  | 0 | 11.058038  | 0.028554  | -0.299596 |
| 131 | 1  | 0 | 9.072975   | 0.816511  | -0.891554 |
| 132 | 6  | 0 | 11.566305  | -1.131044 | 0.215567  |
| 133 | 1  | 0 | 11.670234  | 0.890816  | -0.542417 |
| 134 | 1  | 0 | 12.592637  | -1.375377 | 0.453799  |
| 135 | 6  | 0 | -1.899402  | -3.616654 | 0.513025  |
| 136 | 6  | 0 | -0.269575  | 3.002454  | -1.562623 |
| 137 | 1  | 0 | -1.344170  | 3.062521  | -1.770361 |
| 138 | 1  | 0 | 0.209235   | 3.779205  | -2.176510 |
| 139 | 1  | 0 | -1.664959  | -3.292437 | 1.527866  |
| 140 | 1  | 0 | -1.909234  | -4.710593 | 0.499890  |
| 141 | 3  | 0 | 2.555451   | 3.425803  | -3.713261 |
| 142 | 3  | 0 | -1.983072  | 1.122511  | -4.963785 |
| 143 | 3  | 0 | -2.245384  | -4.533435 | -3.647497 |

144            3            0            1.861043    -1.594200    2.071248

---

**Table S5X.** Cartesian coordinates of optimized geometry of **PBPI-unit-1-2Li** in CH<sub>2</sub>Cl<sub>2</sub> solution (DFT, B3LYP/6-31g\*)

Standard orientation: (Ground State)

---

| Center Number | Atomic Number | Atomic Type | Coordinates (Angstroms) |           |           |
|---------------|---------------|-------------|-------------------------|-----------|-----------|
|               |               |             | X                       | Y         | Z         |
| 1             | 6             | 0           | -0.257175               | -0.840545 | -2.555450 |
| 2             | 6             | 0           | -0.620139               | 0.284214  | -3.434764 |
| 3             | 6             | 0           | -1.128225               | 0.037953  | -4.690316 |
| 4             | 6             | 0           | -1.384023               | -1.283625 | -5.147012 |
| 5             | 6             | 0           | -1.363700               | -2.303411 | -4.225704 |
| 6             | 6             | 0           | -0.972270               | -2.098377 | -2.868165 |
| 7             | 6             | 0           | 0.791001                | -0.783303 | -1.661825 |
| 8             | 6             | 0           | 1.784344                | 0.312859  | -1.654314 |
| 9             | 6             | 0           | 3.138392                | -0.034386 | -1.431962 |
| 10            | 6             | 0           | 3.537391                | -1.267643 | -0.933027 |
| 11            | 6             | 0           | 2.482759                | -2.138581 | -0.484296 |
| 12            | 6             | 0           | 1.169750                | -1.910088 | -0.793640 |
| 13            | 1             | 0           | -1.398031               | 0.886223  | -5.313370 |
| 14            | 1             | 0           | -1.720905               | -3.292154 | -4.499117 |
| 15            | 1             | 0           | 3.877324                | 0.742690  | -1.607863 |
| 16            | 1             | 0           | 2.714662                | -2.949592 | 0.198972  |
| 17            | 6             | 0           | 0.168086                | -2.670753 | 0.008721  |
| 18            | 6             | 0           | -1.263207               | -3.118833 | -1.950261 |
| 19            | 8             | 0           | 0.427830                | -3.049645 | 1.156230  |
| 20            | 8             | 0           | -1.762185               | -4.255200 | -2.267254 |
| 21            | 6             | 0           | 1.496978                | 1.672653  | -1.891237 |
| 22            | 6             | 0           | -0.717343               | 1.688179  | -2.959915 |
| 23            | 8             | 0           | -1.565955               | 2.462594  | -3.416741 |
| 24            | 8             | 0           | 2.382847                | 2.586001  | -1.999127 |
| 25            | 7             | 0           | -1.089134               | -2.893849 | -0.540496 |
| 26            | 7             | 0           | 0.133758                | 2.113986  | -1.936846 |
| 27            | 6             | 0           | 0.221557                | 3.507564  | 0.160957  |
| 28            | 1             | 0           | 1.305336                | 3.348099  | 0.244102  |
| 29            | 6             | 0           | -3.537625               | -2.930997 | 0.048077  |

|    |   |   |           |           |           |
|----|---|---|-----------|-----------|-----------|
| 30 | 1 | 0 | -3.790386 | -3.221708 | -0.980840 |
| 31 | 6 | 0 | -0.496282 | 2.412300  | 0.989611  |
| 32 | 1 | 0 | -1.409171 | 2.829538  | 1.440402  |
| 33 | 1 | 0 | -0.827055 | 1.615472  | 0.311621  |
| 34 | 6 | 0 | 0.369065  | 1.761351  | 2.081189  |
| 35 | 1 | 0 | 0.691516  | 2.514438  | 2.813409  |
| 36 | 1 | 0 | 1.285904  | 1.372368  | 1.615025  |
| 37 | 6 | 0 | -3.610438 | -1.384779 | 0.147766  |
| 38 | 1 | 0 | -2.592093 | -0.976573 | 0.126784  |
| 39 | 1 | 0 | -4.036911 | -1.096161 | 1.119842  |
| 40 | 6 | 0 | -0.081768 | 4.943208  | 0.640326  |
| 41 | 1 | 0 | 0.417767  | 5.652288  | -0.037605 |
| 42 | 1 | 0 | -1.160951 | 5.130765  | 0.529971  |
| 43 | 6 | 0 | 0.334468  | 5.277297  | 2.079478  |
| 44 | 1 | 0 | -0.205384 | 4.631337  | 2.784527  |
| 45 | 1 | 0 | 1.403270  | 5.053891  | 2.214725  |
| 46 | 6 | 0 | -4.521897 | -3.653544 | 0.991995  |
| 47 | 1 | 0 | -4.359395 | -4.739080 | 0.906921  |
| 48 | 1 | 0 | -4.272658 | -3.392450 | 2.031984  |
| 49 | 6 | 0 | -6.009727 | -3.367689 | 0.748382  |
| 50 | 1 | 0 | -6.214799 | -2.298699 | 0.895514  |
| 51 | 1 | 0 | -6.257204 | -3.585640 | -0.301375 |
| 52 | 6 | 0 | -4.405687 | -0.717082 | -0.985555 |
| 53 | 1 | 0 | -5.442188 | -1.083039 | -0.987571 |
| 54 | 1 | 0 | -3.967686 | -1.025927 | -1.945133 |
| 55 | 6 | 0 | -0.342784 | 0.612990  | 2.806350  |
| 56 | 1 | 0 | -0.624487 | -0.151987 | 2.068857  |
| 57 | 1 | 0 | -1.283960 | 0.980913  | 3.242809  |
| 58 | 6 | 0 | 0.502958  | -0.041804 | 3.907140  |
| 59 | 1 | 0 | 0.741666  | 0.706148  | 4.678506  |
| 60 | 1 | 0 | 1.465133  | -0.361857 | 3.481248  |
| 61 | 6 | 0 | -0.181782 | -1.250119 | 4.558086  |
| 62 | 1 | 0 | -0.370157 | -2.007210 | 3.783706  |
| 63 | 1 | 0 | -1.167515 | -0.947039 | 4.943071  |
| 64 | 6 | 0 | 0.630588  | -1.882259 | 5.695930  |
| 65 | 1 | 0 | 0.820516  | -1.126513 | 6.473313  |
| 66 | 1 | 0 | 1.618292  | -2.181490 | 5.314462  |
| 67 | 6 | 0 | -0.053036 | -3.099089 | 6.332349  |
| 68 | 1 | 0 | -0.239491 | -3.854777 | 5.556056  |

|     |   |   |           |           |           |
|-----|---|---|-----------|-----------|-----------|
| 69  | 1 | 0 | -1.041498 | -2.801557 | 6.711210  |
| 70  | 6 | 0 | 0.760937  | -3.725887 | 7.469423  |
| 71  | 1 | 0 | 0.246550  | -4.592247 | 7.901684  |
| 72  | 1 | 0 | 1.742137  | -4.064032 | 7.113445  |
| 73  | 1 | 0 | 0.933778  | -3.003606 | 8.277191  |
| 74  | 6 | 0 | 0.072269  | 6.744086  | 2.447638  |
| 75  | 1 | 0 | 0.619516  | 7.397150  | 1.751189  |
| 76  | 1 | 0 | -0.994546 | 6.968780  | 2.299162  |
| 77  | 6 | 0 | 0.466545  | 7.097180  | 3.887684  |
| 78  | 1 | 0 | -0.081491 | 6.445543  | 4.584613  |
| 79  | 1 | 0 | 1.533498  | 6.873972  | 4.038491  |
| 80  | 6 | 0 | 0.201167  | 8.563162  | 4.253427  |
| 81  | 1 | 0 | -0.864959 | 8.785837  | 4.103345  |
| 82  | 1 | 0 | 0.748712  | 9.214592  | 3.557236  |
| 83  | 6 | 0 | 0.596404  | 8.908648  | 5.693048  |
| 84  | 1 | 0 | 0.392390  | 9.960828  | 5.923269  |
| 85  | 1 | 0 | 0.040694  | 8.295649  | 6.413576  |
| 86  | 1 | 0 | 1.665594  | 8.731117  | 5.863557  |
| 87  | 6 | 0 | -4.406345 | 0.815078  | -0.914686 |
| 88  | 1 | 0 | -3.366984 | 1.173806  | -0.928488 |
| 89  | 1 | 0 | -4.831235 | 1.140214  | 0.047203  |
| 90  | 6 | 0 | -5.181306 | 1.475640  | -2.062846 |
| 91  | 1 | 0 | -6.230699 | 1.144985  | -2.031165 |
| 92  | 1 | 0 | -4.774921 | 1.119443  | -3.020632 |
| 93  | 6 | 0 | -5.127436 | 3.008622  | -2.040048 |
| 94  | 1 | 0 | -4.079598 | 3.326605  | -2.135878 |
| 95  | 1 | 0 | -5.476640 | 3.373325  | -1.061994 |
| 96  | 6 | 0 | -5.956852 | 3.667287  | -3.149921 |
| 97  | 1 | 0 | -7.007433 | 3.352473  | -3.056711 |
| 98  | 1 | 0 | -5.613515 | 3.296391  | -4.127276 |
| 99  | 6 | 0 | -5.887237 | 5.199880  | -3.141129 |
| 100 | 1 | 0 | -4.837846 | 5.513258  | -3.235707 |
| 101 | 1 | 0 | -6.229356 | 5.572384  | -2.164731 |
| 102 | 6 | 0 | -6.716304 | 5.850462  | -4.253519 |
| 103 | 1 | 0 | -6.644044 | 6.943952  | -4.221127 |
| 104 | 1 | 0 | -6.375494 | 5.522932  | -5.243670 |
| 105 | 1 | 0 | -7.776958 | 5.583776  | -4.164519 |
| 106 | 6 | 0 | -6.930660 | -4.184152 | 1.665704  |
| 107 | 1 | 0 | -6.736942 | -5.256544 | 1.512151  |

|     |    |   |            |           |           |
|-----|----|---|------------|-----------|-----------|
| 108 | 1  | 0 | -6.672434  | -3.976903 | 2.714984  |
| 109 | 6  | 0 | -8.423090  | -3.904128 | 1.448648  |
| 110 | 1  | 0 | -8.620030  | -2.833979 | 1.611827  |
| 111 | 1  | 0 | -8.682440  | -4.103821 | 0.397930  |
| 112 | 6  | 0 | -9.339460  | -4.730709 | 2.360185  |
| 113 | 1  | 0 | -9.078949  | -4.532627 | 3.409757  |
| 114 | 1  | 0 | -9.143953  | -5.800026 | 2.195147  |
| 115 | 6  | 0 | -10.828778 | -4.444546 | 2.142114  |
| 116 | 1  | 0 | -11.454942 | -5.050578 | 2.807198  |
| 117 | 1  | 0 | -11.061259 | -3.389757 | 2.334713  |
| 118 | 1  | 0 | -11.127702 | -4.665382 | 1.109741  |
| 119 | 1  | 0 | -1.722364  | -1.456695 | -6.164524 |
| 120 | 6  | 0 | 4.926787   | -1.630368 | -0.725665 |
| 121 | 6  | 0 | 5.454576   | -2.838891 | -0.303332 |
| 122 | 16 | 0 | 6.246106   | -0.490232 | -1.019711 |
| 123 | 6  | 0 | 6.867513   | -2.856429 | -0.202343 |
| 124 | 1  | 0 | 4.837634   | -3.701437 | -0.078728 |
| 125 | 6  | 0 | 7.475260   | -1.668939 | -0.551650 |
| 126 | 1  | 0 | 7.426458   | -3.728255 | 0.123892  |
| 127 | 6  | 0 | 8.877970   | -1.325117 | -0.576994 |
| 128 | 6  | 0 | 9.474819   | -0.097920 | -0.789912 |
| 129 | 16 | 0 | 10.116133  | -2.553762 | -0.319822 |
| 130 | 6  | 0 | 10.898777  | -0.135988 | -0.743520 |
| 131 | 1  | 0 | 8.906883   | 0.810066  | -0.963884 |
| 132 | 6  | 0 | 11.394568  | -1.385513 | -0.495108 |
| 133 | 1  | 0 | 11.526955  | 0.737176  | -0.884739 |
| 134 | 1  | 0 | 12.425468  | -1.699067 | -0.401308 |
| 135 | 6  | 0 | -2.119662  | -3.461388 | 0.343913  |
| 136 | 6  | 0 | -0.148250  | 3.427416  | -1.335182 |
| 137 | 1  | 0 | -1.219561  | 3.591428  | -1.463980 |
| 138 | 1  | 0 | 0.365715   | 4.222091  | -1.889782 |
| 139 | 1  | 0 | -1.823705  | -3.195587 | 1.360129  |
| 140 | 1  | 0 | -2.111026  | -4.556614 | 0.283480  |
| 141 | 3  | 0 | 3.576477   | 3.831554  | -2.452963 |
| 142 | 3  | 0 | -2.307660  | -5.916638 | -2.563795 |

-----  
**Table S6X.** Cartesian coordinates of optimized geometry of **PBPI-unit-1-4Li** in CH<sub>2</sub>Cl<sub>2</sub> solution (DFT, B3LYP/6-31g\*)



Standard orientation: (Ground State)

| Center<br>Number | Atomic<br>Number | Atomic<br>Type | Coordinates (Angstroms) |           |           |
|------------------|------------------|----------------|-------------------------|-----------|-----------|
|                  |                  |                | X                       | Y         | Z         |
| 1                | 6                | 0              | 0.028571                | -1.302606 | -2.490135 |
| 2                | 6                | 0              | -0.278786               | -0.332830 | -3.535553 |
| 3                | 6                | 0              | -0.630707               | -0.829296 | -4.881120 |
| 4                | 6                | 0              | -0.660223               | -2.218296 | -5.092337 |
| 5                | 6                | 0              | -0.690061               | -3.134250 | -4.046344 |
| 6                | 6                | 0              | -0.567480               | -2.658515 | -2.646615 |
| 7                | 6                | 0              | 1.020818                | -1.071295 | -1.546110 |
| 8                | 6                | 0              | 1.991002                | 0.044148  | -1.640975 |
| 9                | 6                | 0              | 3.342371                | -0.238803 | -1.364729 |
| 10               | 6                | 0              | 3.751801                | -1.405851 | -0.706479 |
| 11               | 6                | 0              | 2.707078                | -2.255164 | -0.189480 |
| 12               | 6                | 0              | 1.386445                | -2.071331 | -0.547281 |
| 13               | 1                | 0              | -0.341214               | -0.200993 | -5.730277 |
| 14               | 1                | 0              | -0.414150               | -4.172233 | -4.269551 |
| 15               | 1                | 0              | 4.075891                | 0.519869  | -1.631607 |
| 16               | 1                | 0              | 2.962980                | -3.040175 | 0.520976  |
| 17               | 6                | 0              | 0.324004                | -2.669963 | 0.316511  |
| 18               | 6                | 0              | -0.919283               | -3.521781 | -1.641027 |
| 19               | 8                | 0              | 0.480384                | -2.603999 | 1.577366  |
| 20               | 8                | 0              | -1.447730               | -4.714815 | -1.823566 |
| 21               | 6                | 0              | 1.592622                | 1.336885  | -2.054236 |
| 22               | 6                | 0              | -0.279629               | 1.056848  | -3.319701 |
| 23               | 8                | 0              | -0.676711               | 1.910247  | -4.224510 |
| 24               | 8                | 0              | 2.393035                | 2.282147  | -2.401512 |
| 25               | 7                | 0              | -0.800002               | -3.161198 | -0.227992 |
| 26               | 7                | 0              | 0.163128                | 1.567780  | -2.047377 |
| 27               | 6                | 0              | 0.001424                | 3.312797  | -0.252639 |
| 28               | 1                | 0              | 1.073272                | 3.153941  | -0.060774 |
| 29               | 6                | 0              | -3.285877               | -3.092718 | 0.217496  |
| 30               | 1                | 0              | -3.446807               | -3.442629 | -0.810123 |
| 31               | 6                | 0              | -0.807769               | 2.418785  | 0.716658  |
| 32               | 1                | 0              | -1.776045               | 2.896814  | 0.931324  |
| 33               | 1                | 0              | -1.033617               | 1.476898  | 0.201353  |
| 34               | 6                | 0              | -0.104553               | 2.074243  | 2.039233  |

|    |   |   |           |           |           |
|----|---|---|-----------|-----------|-----------|
| 35 | 1 | 0 | 0.173601  | 2.988252  | 2.579371  |
| 36 | 1 | 0 | 0.843264  | 1.563752  | 1.808037  |
| 37 | 6 | 0 | -3.373500 | -1.546426 | 0.232495  |
| 38 | 1 | 0 | -2.359764 | -1.125626 | 0.206271  |
| 39 | 1 | 0 | -3.819132 | -1.212958 | 1.181966  |
| 40 | 6 | 0 | -0.287545 | 4.821540  | -0.092017 |
| 41 | 1 | 0 | 0.305730  | 5.367319  | -0.841377 |
| 42 | 1 | 0 | -1.342140 | 5.006438  | -0.350938 |
| 43 | 6 | 0 | -0.003505 | 5.436251  | 1.285195  |
| 44 | 1 | 0 | -0.654993 | 4.979415  | 2.041862  |
| 45 | 1 | 0 | 1.028881  | 5.203405  | 1.585798  |
| 46 | 6 | 0 | -4.339275 | -3.776049 | 1.116681  |
| 47 | 1 | 0 | -4.164181 | -4.861925 | 1.092820  |
| 48 | 1 | 0 | -4.173069 | -3.465223 | 2.159947  |
| 49 | 6 | 0 | -5.806640 | -3.517890 | 0.748425  |
| 50 | 1 | 0 | -6.035314 | -2.447604 | 0.840858  |
| 51 | 1 | 0 | -5.968107 | -3.776866 | -0.308768 |
| 52 | 6 | 0 | -4.158380 | -0.946359 | -0.945790 |
| 53 | 1 | 0 | -5.151156 | -1.411129 | -1.015150 |
| 54 | 1 | 0 | -3.631880 | -1.203156 | -1.876264 |
| 55 | 6 | 0 | -0.953880 | 1.187132  | 2.959607  |
| 56 | 1 | 0 | -1.244100 | 0.273897  | 2.419044  |
| 57 | 1 | 0 | -1.892629 | 1.709584  | 3.196607  |
| 58 | 6 | 0 | -0.252752 | 0.798991  | 4.268093  |
| 59 | 1 | 0 | 0.044290  | 1.710759  | 4.807398  |
| 60 | 1 | 0 | 0.684885  | 0.268039  | 4.037053  |
| 61 | 6 | 0 | -1.111691 | -0.078258 | 5.188291  |
| 62 | 1 | 0 | -1.417254 | -0.983982 | 4.643455  |
| 63 | 1 | 0 | -2.040785 | 0.457818  | 5.432512  |
| 64 | 6 | 0 | -0.405621 | -0.484431 | 6.488147  |
| 65 | 1 | 0 | -0.095334 | 0.420249  | 7.032289  |
| 66 | 1 | 0 | 0.521599  | -1.025862 | 6.244782  |
| 67 | 6 | 0 | -1.269190 | -1.356177 | 7.409118  |
| 68 | 1 | 0 | -1.580178 | -2.259161 | 6.864622  |
| 69 | 1 | 0 | -2.194122 | -0.815253 | 7.655012  |
| 70 | 6 | 0 | -0.555680 | -1.761096 | 8.703191  |
| 71 | 1 | 0 | -1.198873 | -2.381579 | 9.337914  |
| 72 | 1 | 0 | 0.355287  | -2.334404 | 8.490303  |
| 73 | 1 | 0 | -0.262503 | -0.879166 | 9.286330  |

|     |   |   |           |           |           |
|-----|---|---|-----------|-----------|-----------|
| 74  | 6 | 0 | -0.206314 | 6.957786  | 1.313897  |
| 75  | 1 | 0 | 0.454277  | 7.426759  | 0.569221  |
| 76  | 1 | 0 | -1.234160 | 7.192414  | 0.998623  |
| 77  | 6 | 0 | 0.055453  | 7.584868  | 2.689286  |
| 78  | 1 | 0 | -0.605679 | 7.116428  | 3.433847  |
| 79  | 1 | 0 | 1.083060  | 7.350973  | 3.005965  |
| 80  | 6 | 0 | -0.148134 | 9.105151  | 2.721181  |
| 81  | 1 | 0 | -1.174710 | 9.339079  | 2.404695  |
| 82  | 1 | 0 | 0.513429  | 9.574423  | 1.978966  |
| 83  | 6 | 0 | 0.113387  | 9.721447  | 4.099485  |
| 84  | 1 | 0 | -0.040107 | 10.806817 | 4.089183  |
| 85  | 1 | 0 | -0.557805 | 9.296913  | 4.856514  |
| 86  | 1 | 0 | 1.143107  | 9.533288  | 4.428254  |
| 87  | 6 | 0 | -4.321889 | 0.576178  | -0.864116 |
| 88  | 1 | 0 | -3.330552 | 1.042698  | -0.776392 |
| 89  | 1 | 0 | -4.864690 | 0.835660  | 0.057424  |
| 90  | 6 | 0 | -5.057741 | 1.176342  | -2.069445 |
| 91  | 1 | 0 | -6.050795 | 0.710962  | -2.160015 |
| 92  | 1 | 0 | -4.515032 | 0.911833  | -2.990436 |
| 93  | 6 | 0 | -5.217714 | 2.700460  | -1.998448 |
| 94  | 1 | 0 | -4.225233 | 3.164495  | -1.894855 |
| 95  | 1 | 0 | -5.773102 | 2.964020  | -1.086016 |
| 96  | 6 | 0 | -5.931324 | 3.301757  | -3.216010 |
| 97  | 1 | 0 | -6.921783 | 2.834888  | -3.325043 |
| 98  | 1 | 0 | -5.372137 | 3.044030  | -4.129001 |
| 99  | 6 | 0 | -6.097014 | 4.825157  | -3.142159 |
| 100 | 1 | 0 | -5.107571 | 5.291309  | -3.030670 |
| 101 | 1 | 0 | -6.659257 | 5.083274  | -2.233430 |
| 102 | 6 | 0 | -6.805010 | 5.417054  | -4.365326 |
| 103 | 1 | 0 | -6.908371 | 6.505098  | -4.281148 |
| 104 | 1 | 0 | -6.247406 | 5.205531  | -5.286407 |
| 105 | 1 | 0 | -7.810682 | 4.994657  | -4.483529 |
| 106 | 6 | 0 | -6.790675 | -4.313596 | 1.617292  |
| 107 | 1 | 0 | -6.568368 | -5.387317 | 1.526175  |
| 108 | 1 | 0 | -6.629033 | -4.058640 | 2.675380  |
| 109 | 6 | 0 | -8.261739 | -4.069618 | 1.256978  |
| 110 | 1 | 0 | -8.486805 | -2.996685 | 1.352319  |
| 111 | 1 | 0 | -8.422599 | -4.320653 | 0.197647  |
| 112 | 6 | 0 | -9.246560 | -4.869931 | 2.119137  |

|     |    |   |            |           |           |
|-----|----|---|------------|-----------|-----------|
| 113 | 1  | 0 | -9.088165  | -4.618035 | 3.177492  |
| 114 | 1  | 0 | -9.021211  | -5.941830 | 2.024587  |
| 115 | 6  | 0 | -10.712968 | -4.622749 | 1.749771  |
| 116 | 1  | 0 | -11.390058 | -5.208198 | 2.382605  |
| 117 | 1  | 0 | -10.977920 | -3.564553 | 1.867518  |
| 118 | 1  | 0 | -10.910040 | -4.898466 | 0.706209  |
| 119 | 1  | 0 | -0.630768  | -2.594226 | -6.117254 |
| 120 | 6  | 0 | 5.139006   | -1.705508 | -0.421699 |
| 121 | 6  | 0 | 5.698424   | -2.877937 | 0.067870  |
| 122 | 16 | 0 | 6.423388   | -0.509885 | -0.664906 |
| 123 | 6  | 0 | 7.102372   | -2.828739 | 0.241873  |
| 124 | 1  | 0 | 5.112109   | -3.768919 | 0.263539  |
| 125 | 6  | 0 | 7.678524   | -1.625065 | -0.110011 |
| 126 | 1  | 0 | 7.682138   | -3.672636 | 0.604153  |
| 127 | 6  | 0 | 9.063685   | -1.222404 | -0.078345 |
| 128 | 6  | 0 | 9.641177   | -0.035591 | -0.487968 |
| 129 | 16 | 0 | 10.307893  | -2.301006 | 0.556358  |
| 130 | 6  | 0 | 11.053468  | 0.011173  | -0.301827 |
| 131 | 1  | 0 | 9.067728   | 0.780084  | -0.915849 |
| 132 | 6  | 0 | 11.562338  | -1.131651 | 0.248984  |
| 133 | 1  | 0 | 11.665121  | 0.865937  | -0.571062 |
| 134 | 1  | 0 | 12.588768  | -1.367746 | 0.494979  |
| 135 | 6  | 0 | -1.897564  | -3.605180 | 0.650229  |
| 136 | 6  | 0 | -0.264242  | 2.928302  | -1.724059 |
| 137 | 1  | 0 | -1.340934  | 2.977778  | -1.923845 |
| 138 | 1  | 0 | 0.206553   | 3.678208  | -2.376780 |
| 139 | 1  | 0 | -1.660253  | -3.255442 | 1.655746  |
| 140 | 1  | 0 | -1.904612  | -4.698747 | 0.661263  |
| 141 | 3  | 0 | 2.565773   | 3.310244  | -3.865983 |
| 142 | 3  | 0 | -2.008122  | 0.895428  | -5.046973 |
| 143 | 3  | 0 | -2.258476  | -4.663264 | -3.461052 |
| 144 | 3  | 0 | 1.877050   | -1.438428 | 2.023884  |

---

## Reference

- 1 Z. Wang, R. Song, Y. Zhang, T. Zhang, X. Zhu, J. Zeng, W. Zhang, Z. Zhao, N. Yan and G. He, Biphenyl Diimides-based Novel Blue Emitters with Aggregation Induced Blue-Shifted Emission Characteristics, *ChemPhotoChem*, 2020, **4**, 59-67.

- 2 Y. Kim, J. Hong, J. H. Oh and C. Yang, Naphthalene Diimide Incorporated Thiophene-Free Copolymers with Acene and Heteroacene Units: Comparison of Geometric Features and Electron-Donating Strength of Co-units, *Chem. Mater.*, 2013, **25**, 3251-3259.
